# Supplementary material for: Anti-hepatocellular carcinoma activities of novel hydrazone derivatives via downregulation of interleukin-6
Source: Royal Society of Chemistry journal article supplement (doi:10.1039/d4ra05854b), 2024-01-01
Supplement: d4ra05854b1.pdf [file d4ra05854b1.pdf]

1 **Supporting Information**

2  
3 **Anti-Hepatocellular Carcinoma Activities of Novel Hydrazone Derivatives Via**  
4 **Downregulation of Interleukin-6**  
5

6 Ahmed Nabil \*<sup>1,2,3</sup>, Marwa Abdel-Motaal\*<sup>4,5</sup>, Ayman Hassan<sup>3</sup>, Mohamed M. Elshemy<sup>6</sup>, Medhat  
7 asem<sup>7</sup>, Mariam Elwan<sup>8</sup>, Mitsuhiro Ebara<sup>1,9,10</sup>, Mohammed Abdelmageed<sup>11,12</sup>, Gamal Shiha<sup>3,13</sup>,  
8 Hassan M. E. Azzazy<sup>14\*</sup>  
9

10 <sup>1</sup> Research Center for Macromolecules and Biomaterials, National Institute for Materials Science  
11 (NIMS), Tsukuba 305-0044, Japan.

12 <sup>2</sup> Biotechnology and Life Sciences Department, Faculty of Postgraduate Studies for Advanced  
13 Sciences (PSAS), Beni-Suef University, Beni-Suef, Egypt.

14 <sup>3</sup> Egyptian Liver Research Institute and Hospital (ELRIAH), Sherbin, El Mansoura, Egypt.

15 <sup>4</sup> Chemistry Department, College of Science, Qassim University, Qassim, Buraydah, 51452  
16 Saudi Arabia.

17 <sup>5</sup> Chemistry Department, Faculty of Science, Mansoura University, Mansoura, 35516 Egypt.

18 <sup>6</sup> Faculty of Science, Menoufia University, Menoufia, Egypt.

19 <sup>7</sup> Department of Civil Engineering, College of Engineering and Information Technology,  
20 Onaizah Colleges, Qassim, Saudi Arabia.

21 <sup>8</sup> Egyptian Ministry of Health, El Mansoura, Dakahlia, Egypt.

22 <sup>9</sup> Graduate School of Pure and Applied Sciences, University of Tsukuba, 1-1-1 Tennodai,  
23 Tsukuba, Ibaraki 305-8577, Japan.

24 <sup>10</sup> Graduate School of Industrial Science and Technology, Tokyo University of Science, 6-3-1  
25 Niijuku, Katsushika-ku, Tokyo 125-8585, Japan.

26 <sup>11</sup>Department of Pharmacology and Toxicology, Faculty of Pharmacy, Buraydah Colleges,  
27 Qassim, Saudi Arabia

28 <sup>12</sup>Hot Laboratory Center, Atomic Energy Authority, Cairo, Egypt

29 <sup>13</sup>Hepatology and Gastroenterology Unit, Internal Medicine Department, Faculty of Medicine,  
30 Mansoura University, Egypt.

31 <sup>14</sup>Department of Chemistry, School of Sciences & Engineering, The American University in  
32 Cairo, New Cairo, Egypt, 11835  
33

34 **\*Correspondence may be addressed to:**

35 Marwa Abdel-Motaal; [ma.mohammed@qu.edu.sa](mailto:ma.mohammed@qu.edu.sa), [dr\\_marwachem@mans.edu.eg](mailto:dr_marwachem@mans.edu.eg), Tel  
36 +966569909737  
37

38 Ahmed Nabil; [TOLBA.AhmedNabil@nims.go.jp](mailto:TOLBA.AhmedNabil@nims.go.jp) Tel.: (008180-3540-4321, +201000618349)  
39

40 Hassan M. E. Azzazy; [hazzazy@aucegypt.edu](mailto:hazzazy@aucegypt.edu), Tel: 00201000565727  
41  
42  
43

44

45 **Table of contents:**

46 **Figure S1. Spectral analyses of different hydrazone derivatives.**

47 **Table S1. Physicochemical and spectroscopy data for the synthesized compounds**

48 **Figure S2. Caspase 3 assay.**

49 **Figure S3. Cell cycle analysis.**

50

51

52

53

54

55

56

57

58

59

60

61

62

63

64

65

66

67

68

69

70

71

72

73

74 **Figure S1. Spectral analyses of different hydrazone derivatives.**

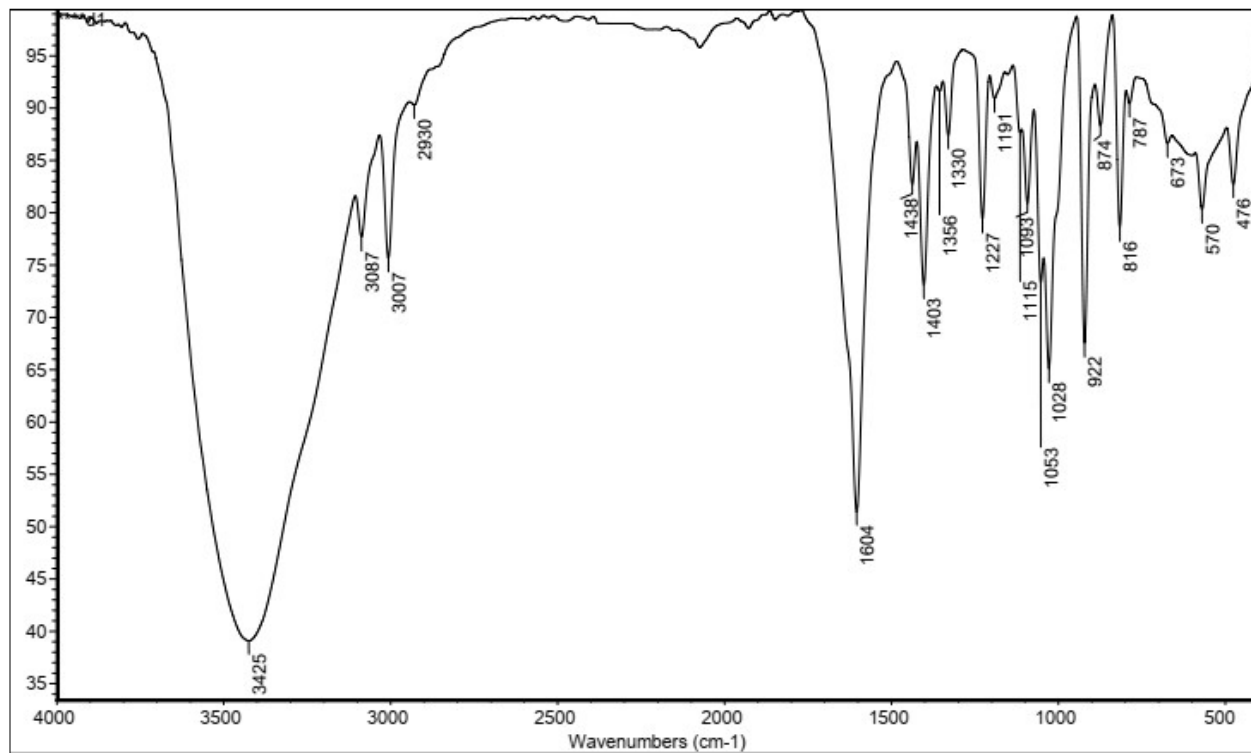

75

76

**FTIR spectrum of compound 2.**

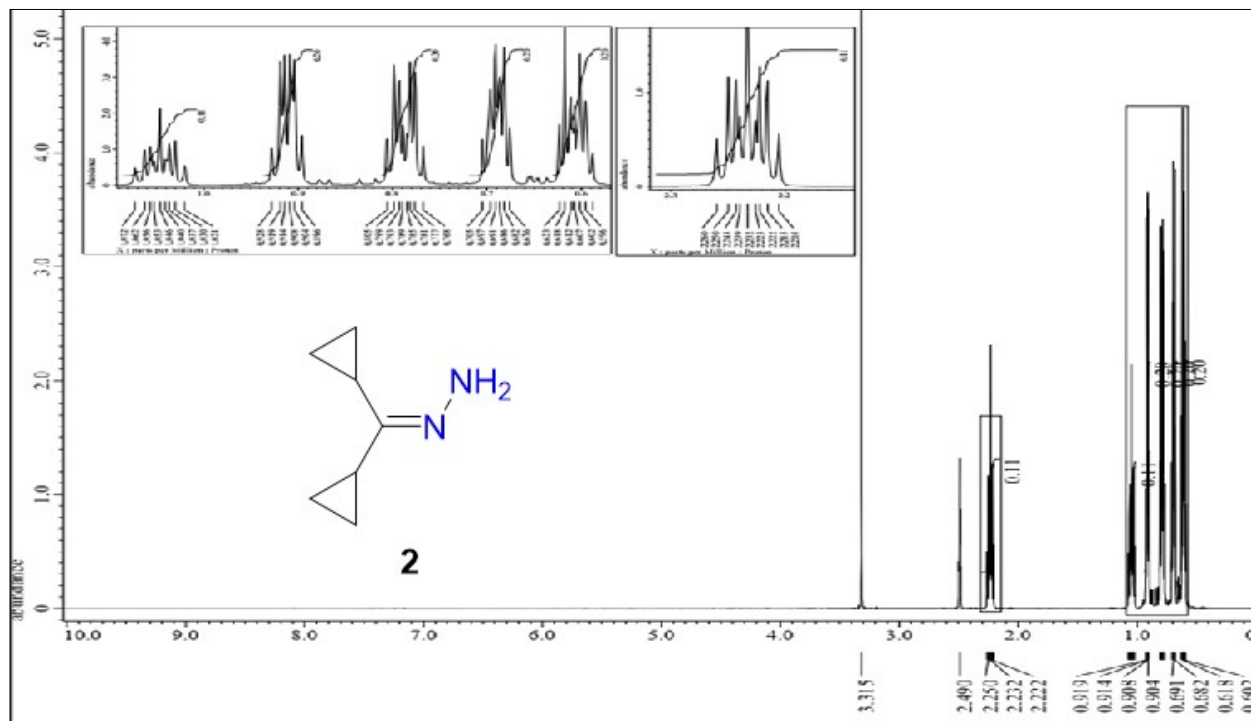

77

78

**$^1\text{H-NMR}$  (500 MHz, DMSO) spectrum of compound 2.**

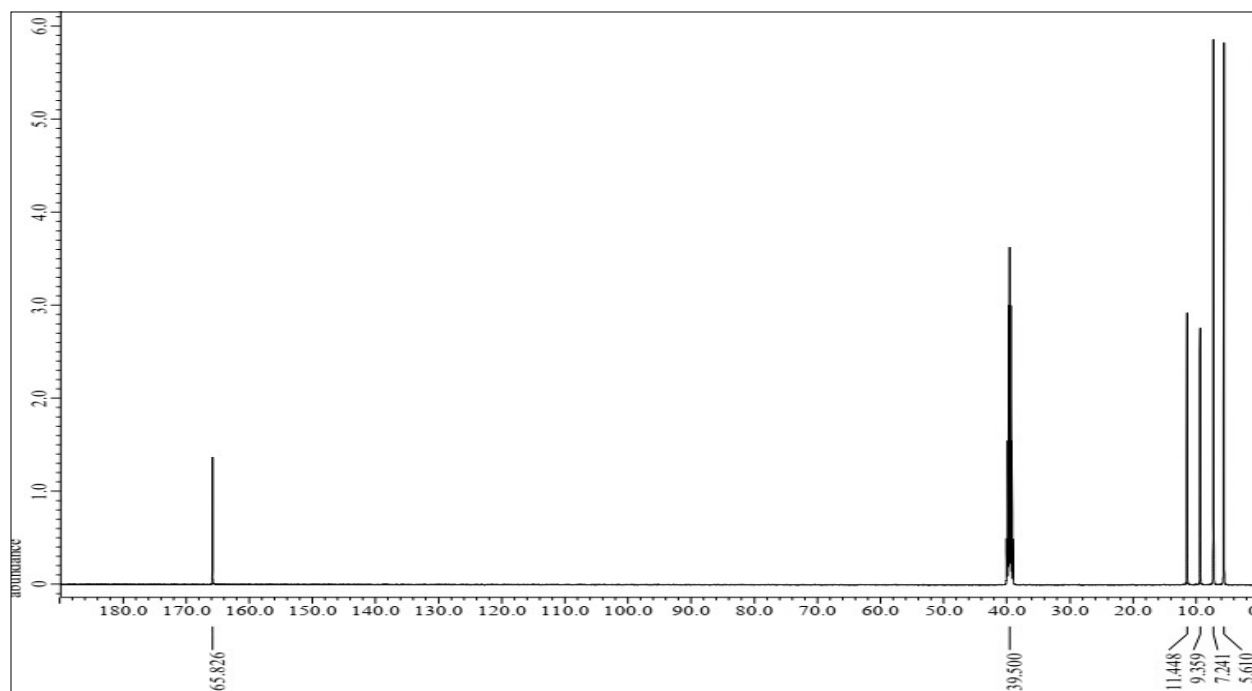

79

80

**$^{13}\text{C-NMR}$  spectrum (125 MHz, DMSO) spectrum of compound 2.**

81

82

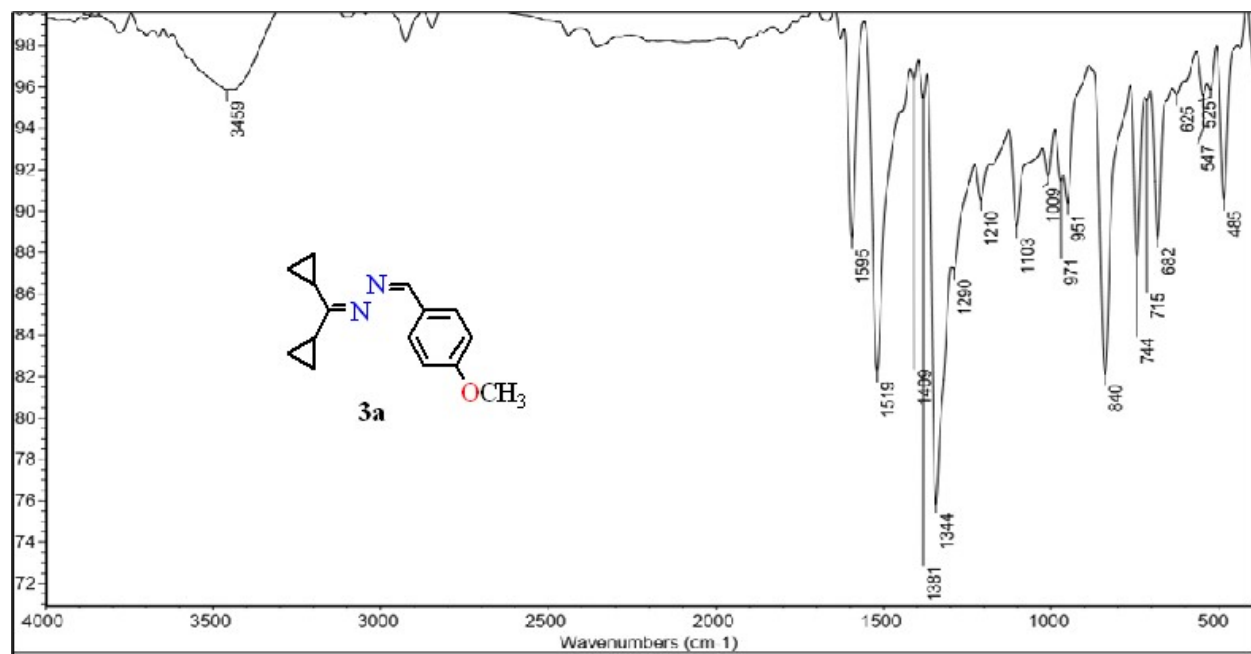

83

84

**FTIR spectrum of compound 3a.**

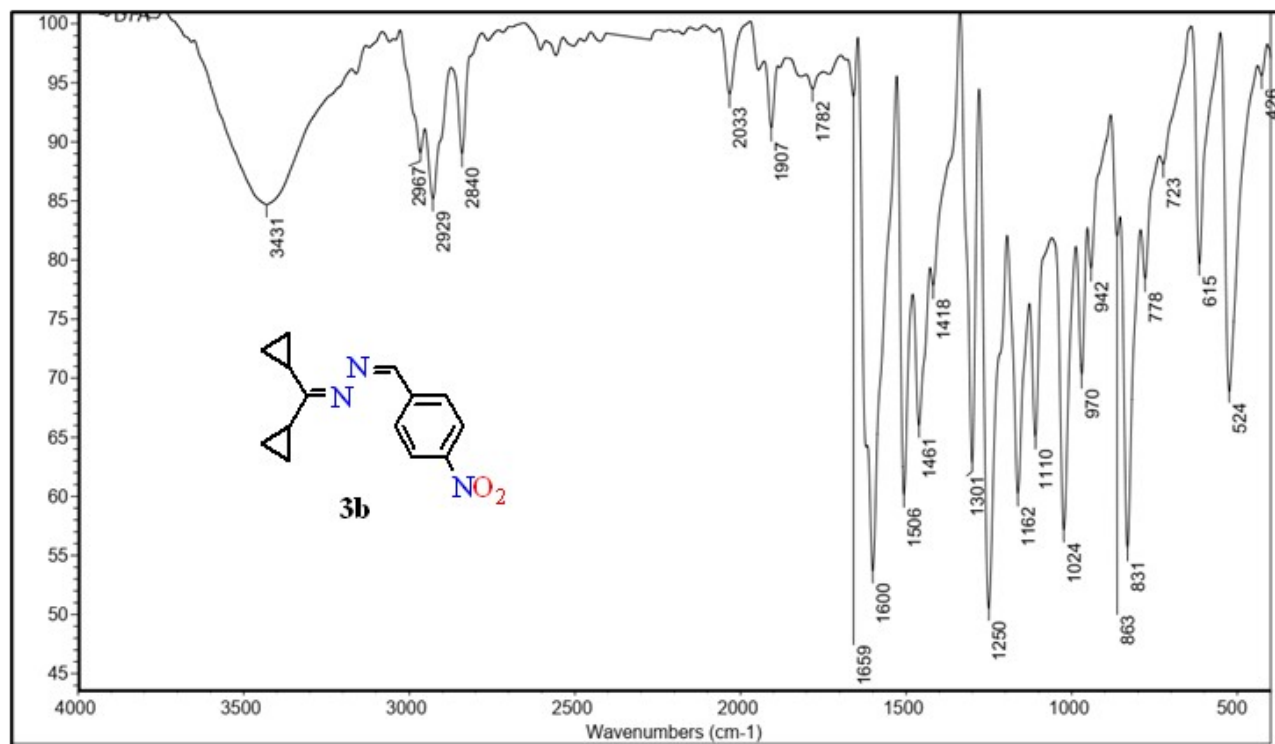

85

86

FTIR spectrum of compound 3b.

87

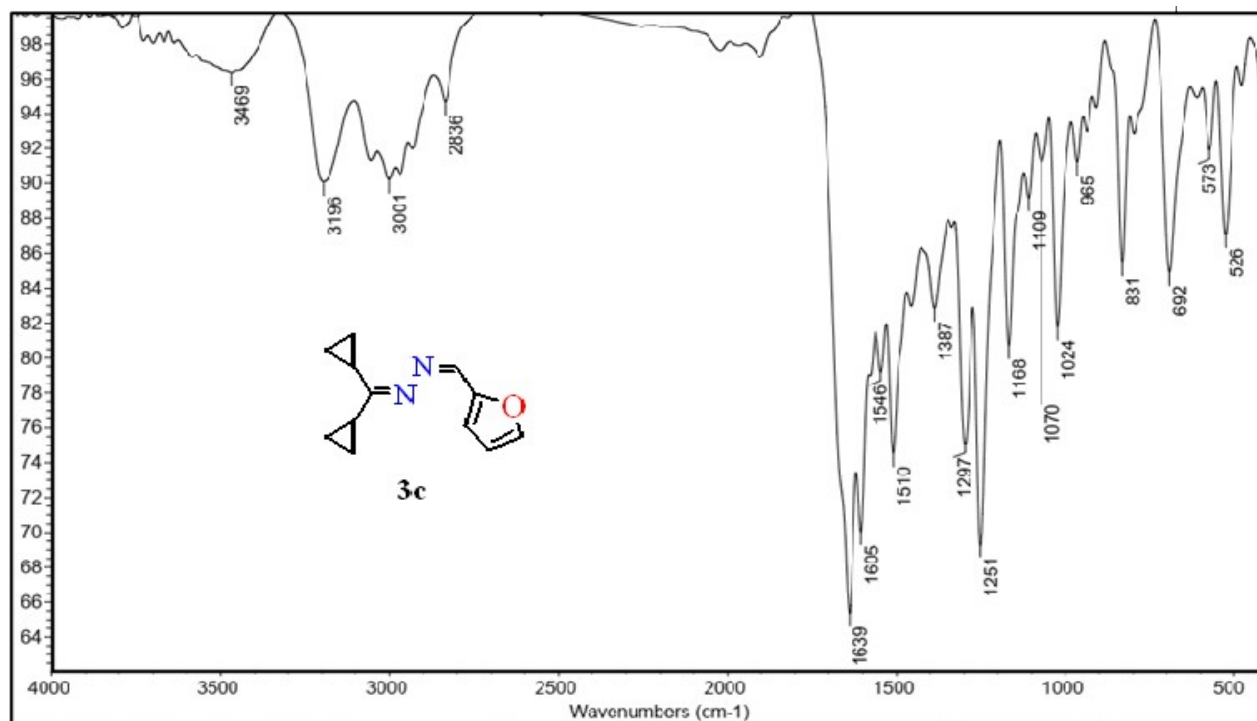

88

89

FTIR and <sup>1</sup>H-NMR (500 MHz, DMSO) spectra of compound 3c.

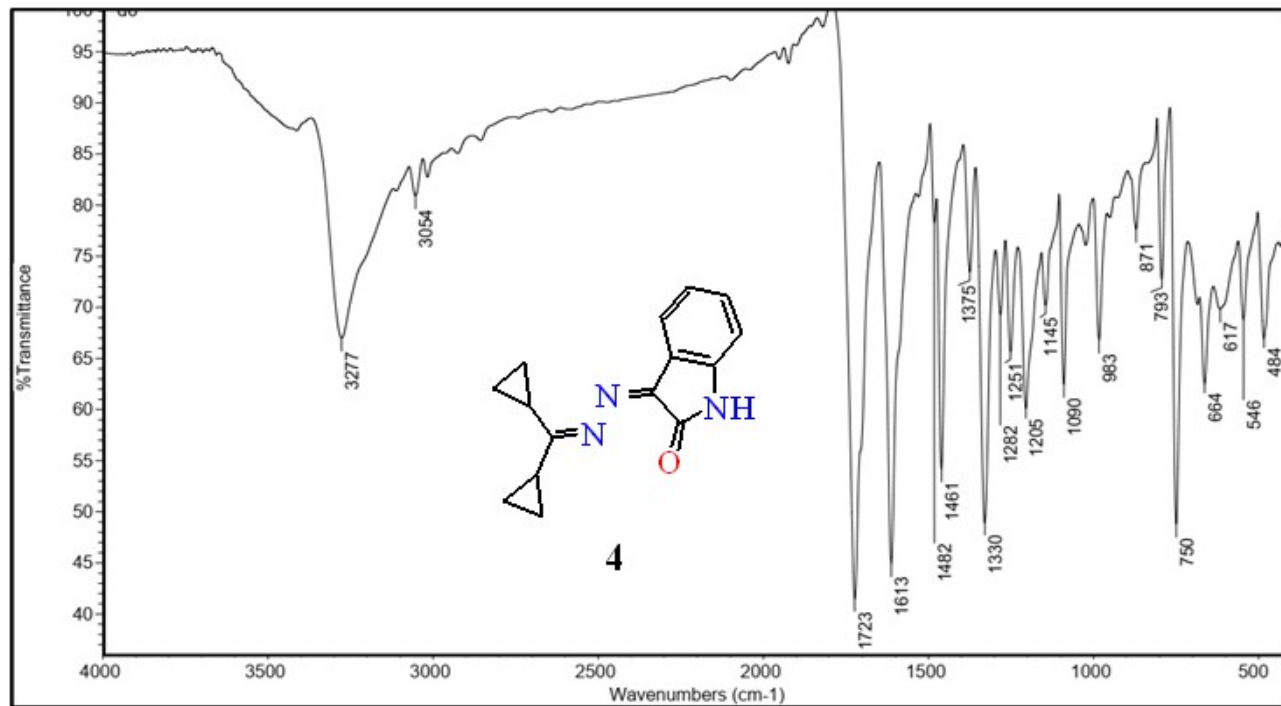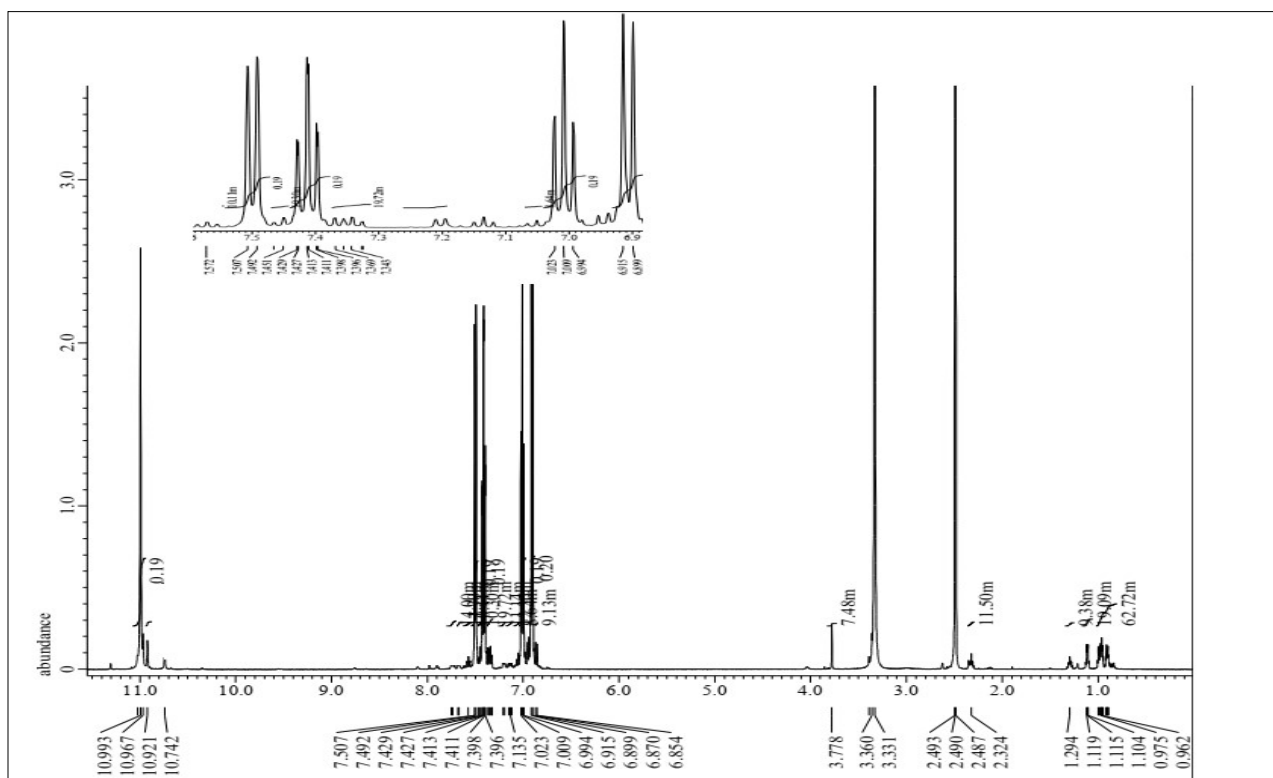

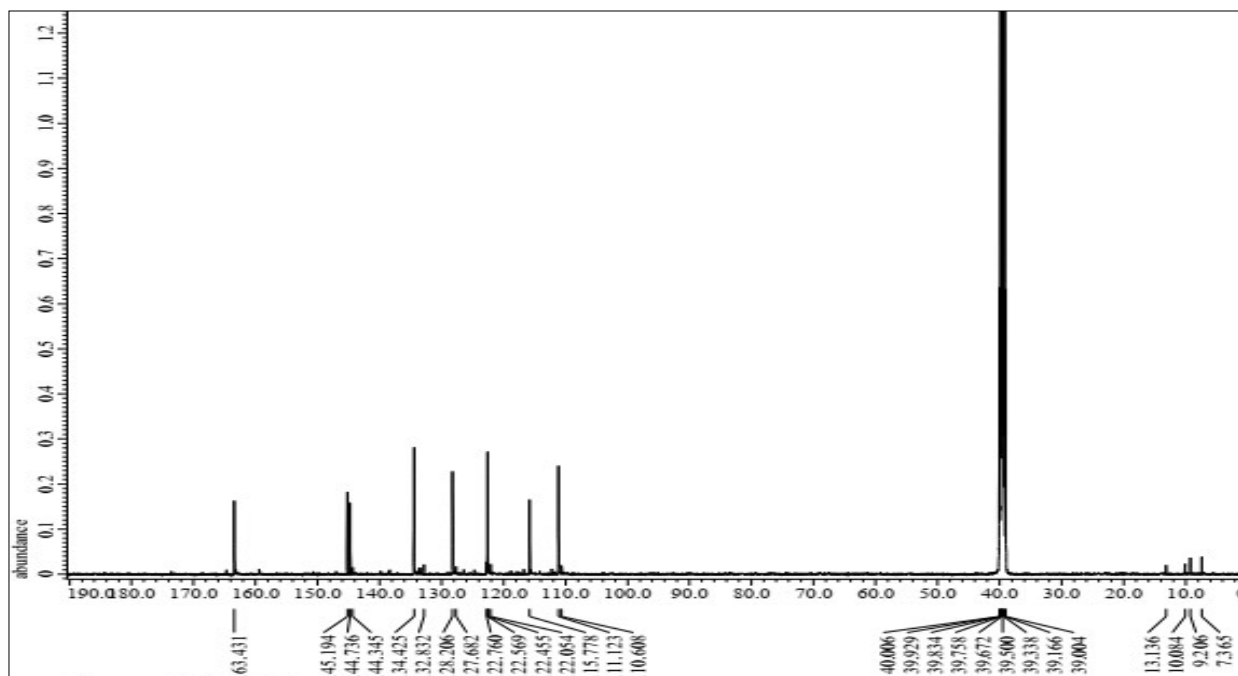

92

FTIR, <sup>1</sup>H-NMR (500 MHz, DMSO), and <sup>13</sup>C-NMR (125 MHz, DMSO) spectra of compound 4.

93

94

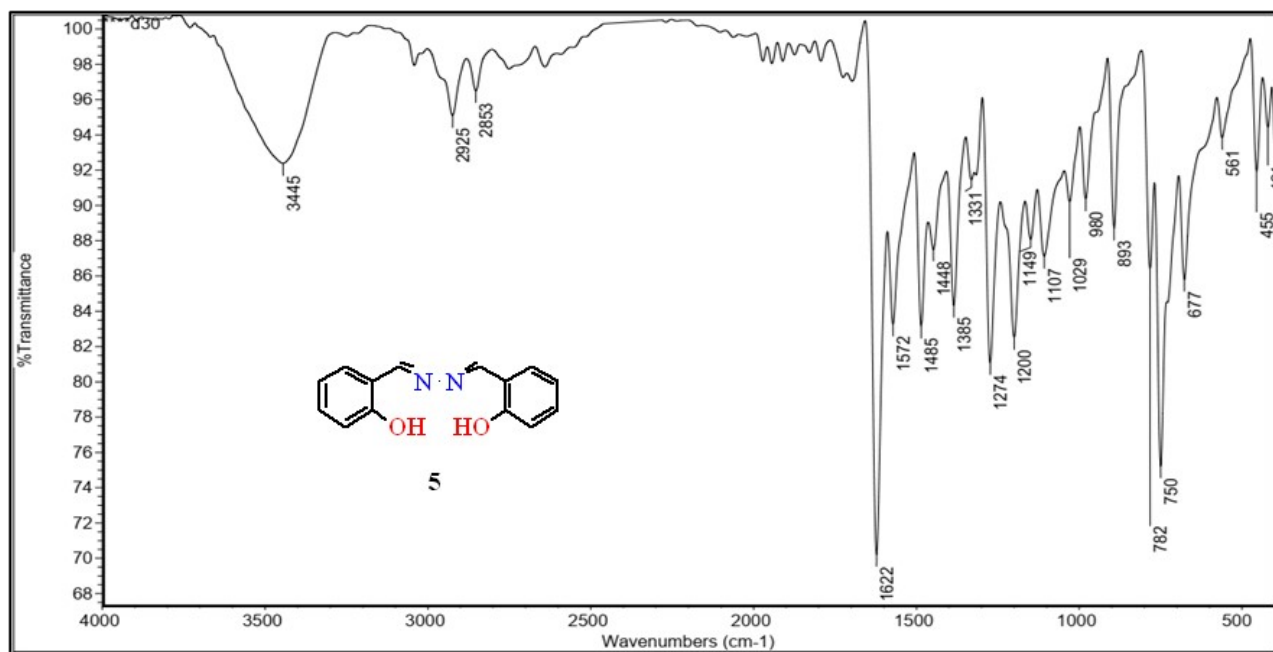

95

96

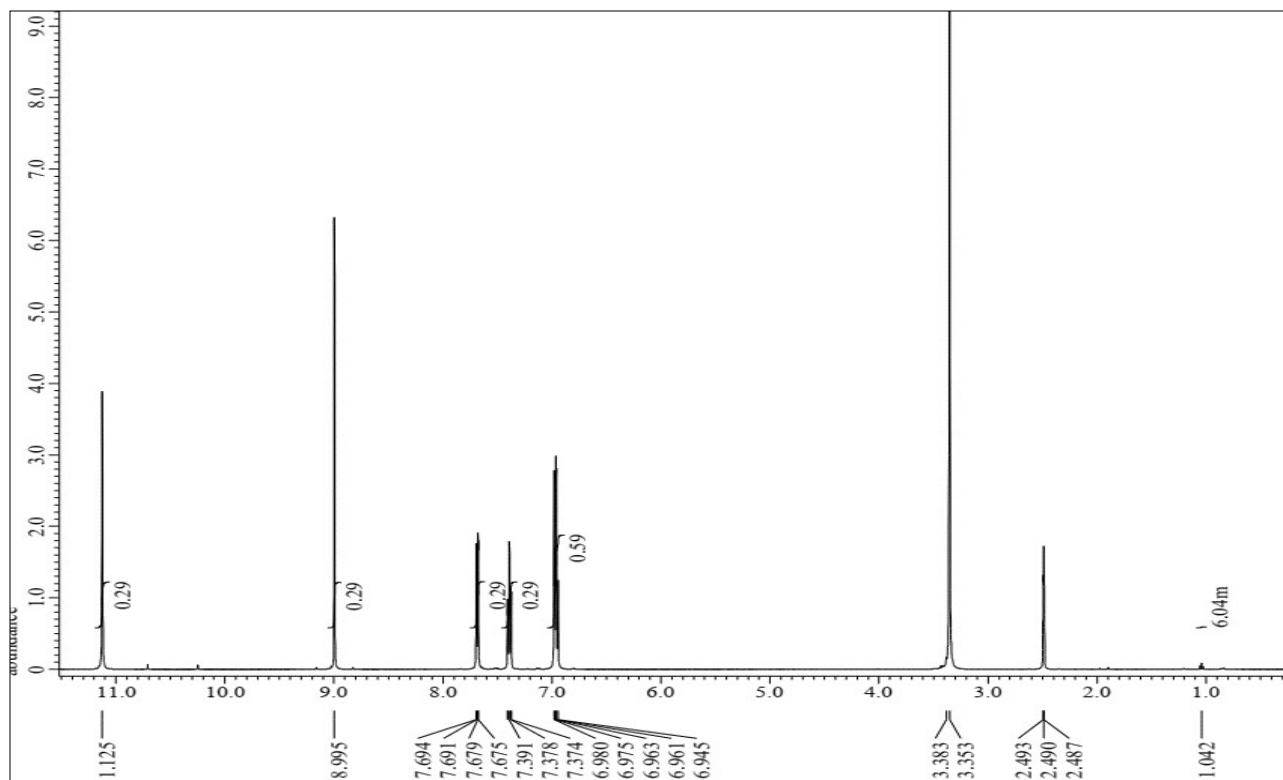

97

98

**FTIR and <sup>1</sup>H-NMR (500 MHz, DMSO) spectra of compound 5.**

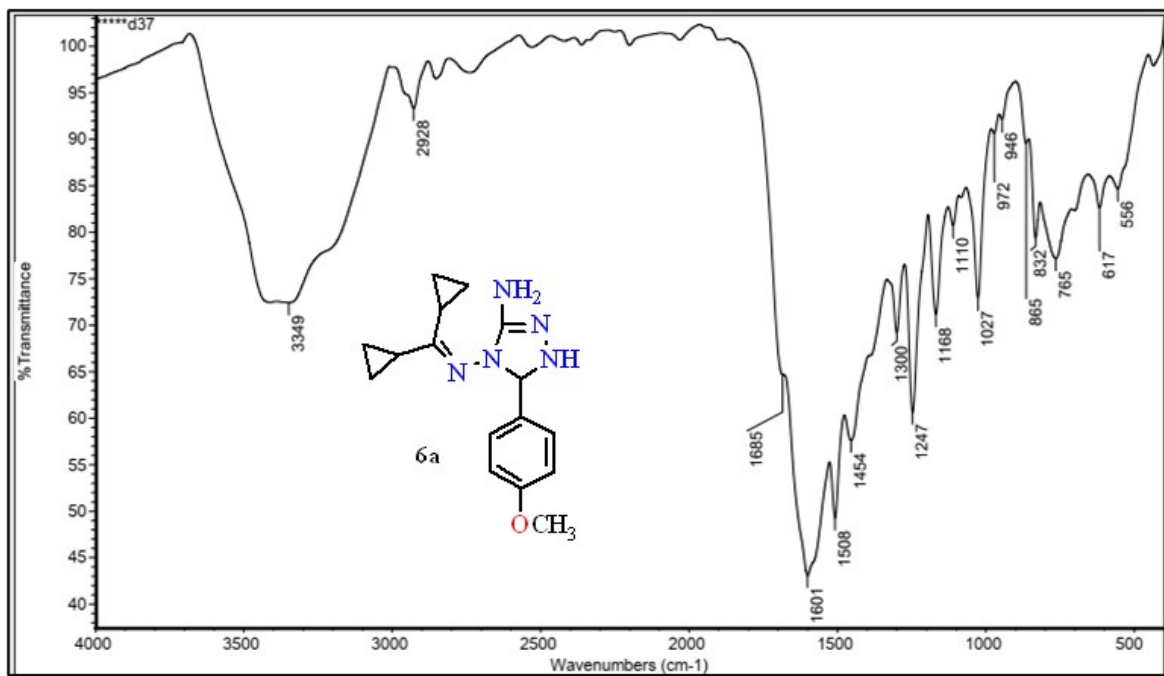

99



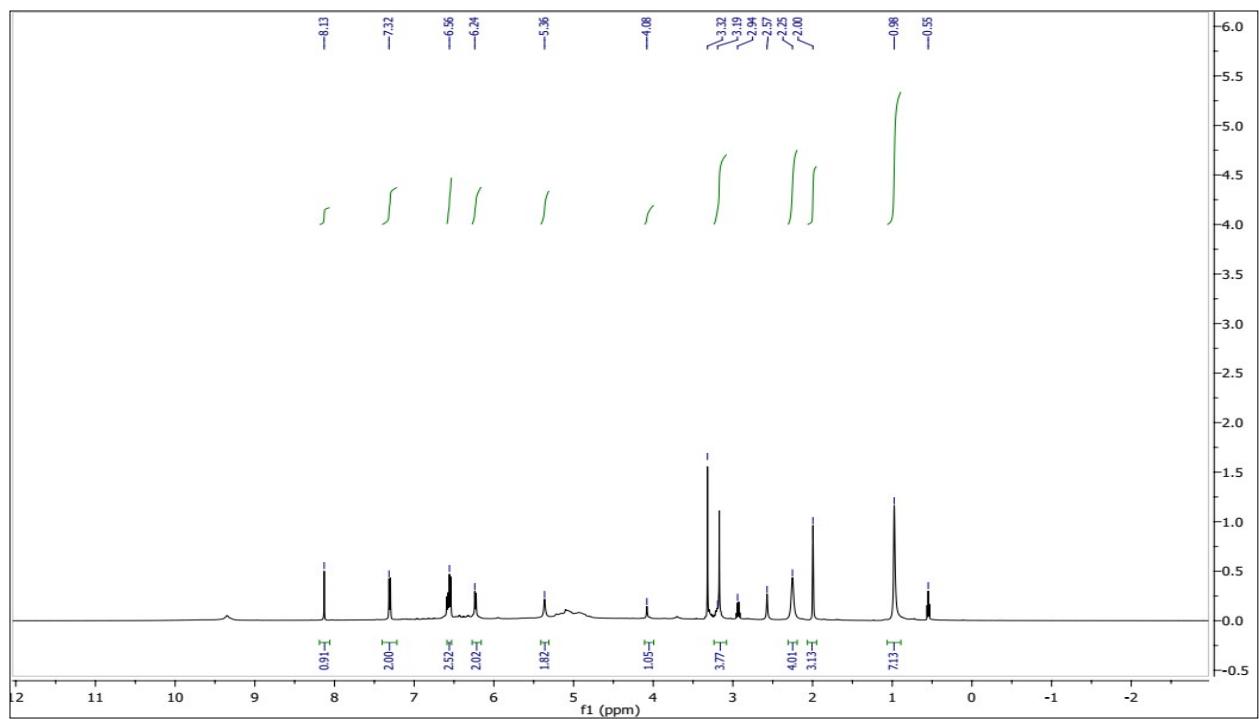

100

101

**FTIR and <sup>1</sup>H-NMR (500 MHz, DMSO) spectra of compound 6a.**

102

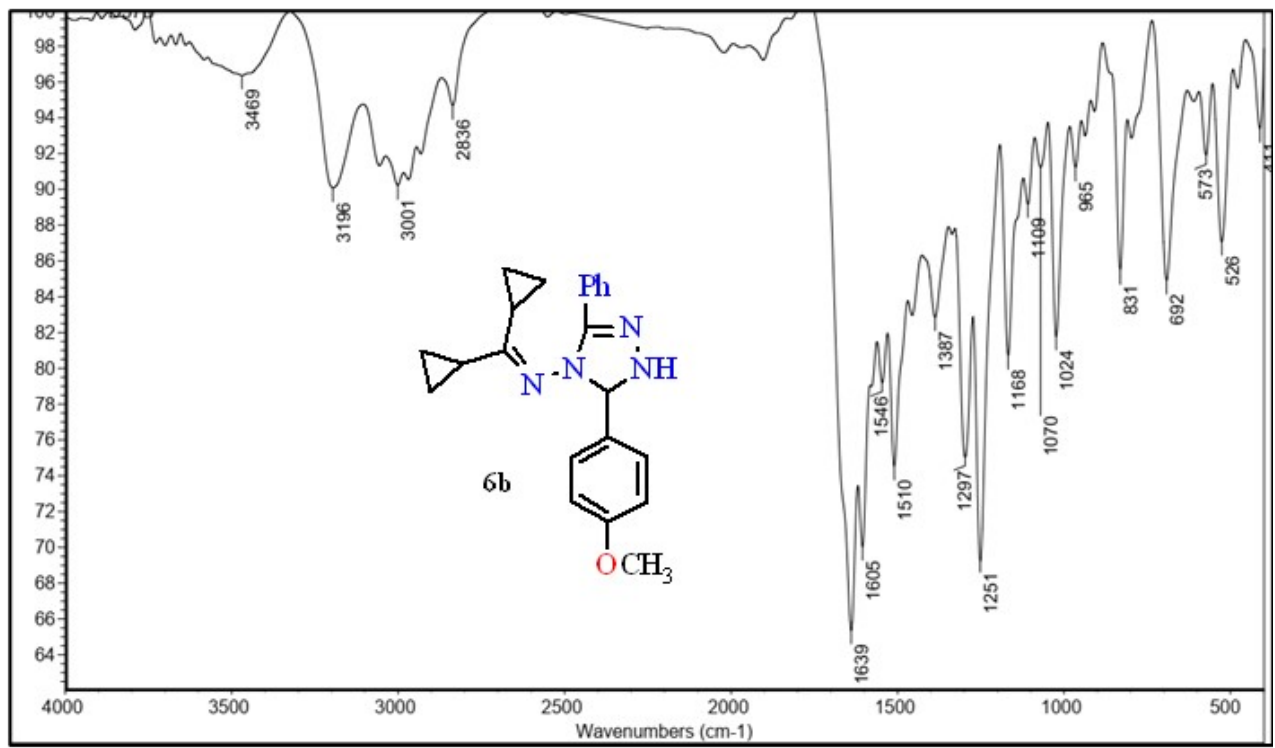

103

104

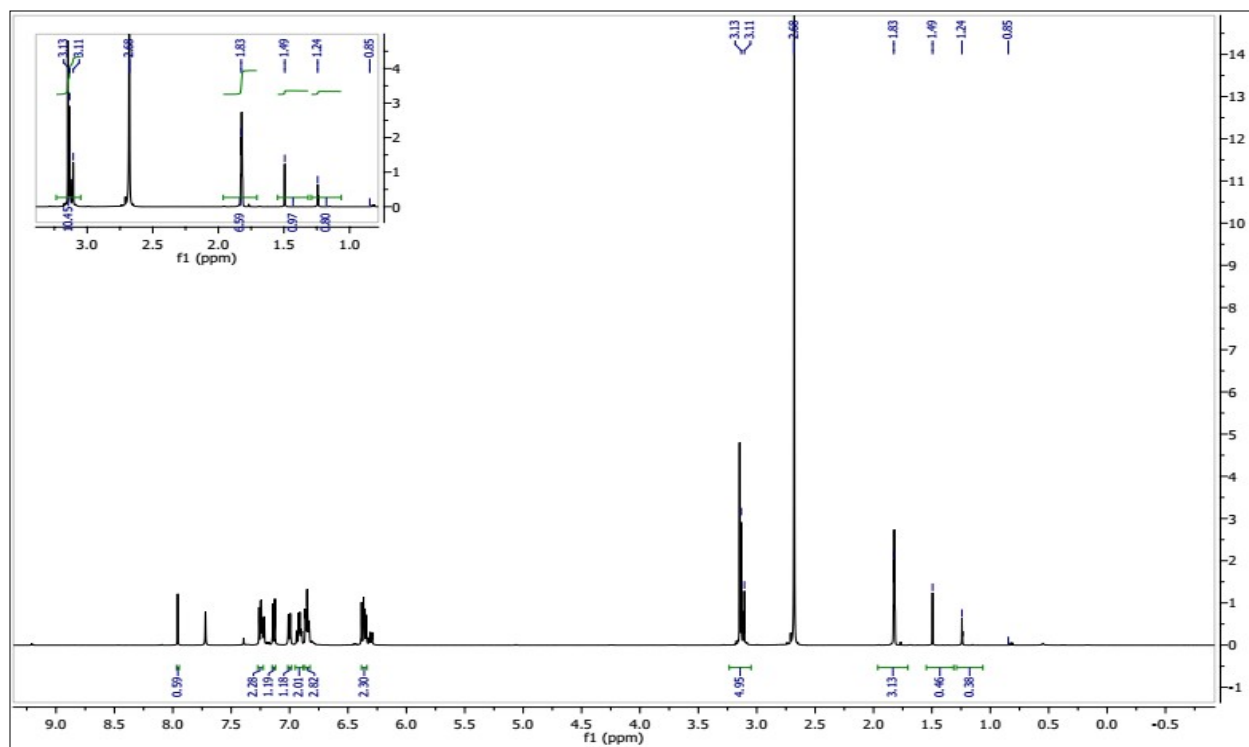

105

106

FTIR and <sup>1</sup>H-NMR (500 MHz, DMSO) spectra of compound 6b.

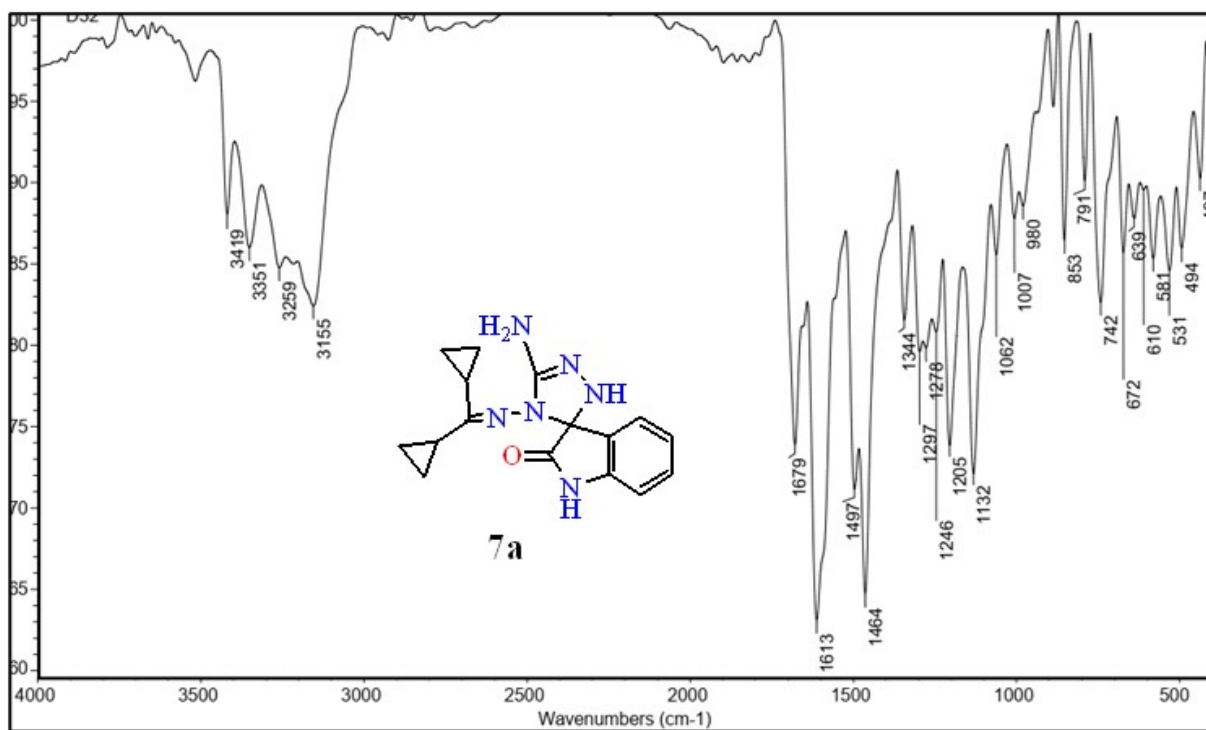

107

108

109

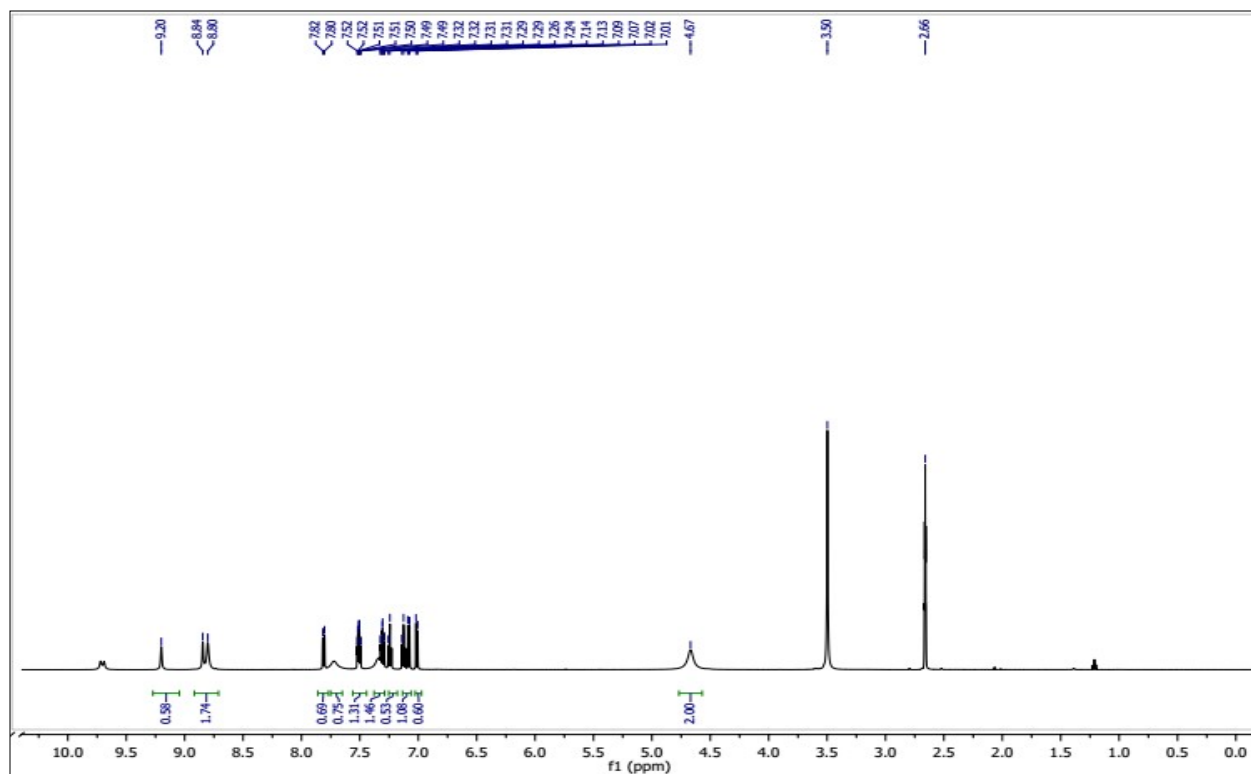

110

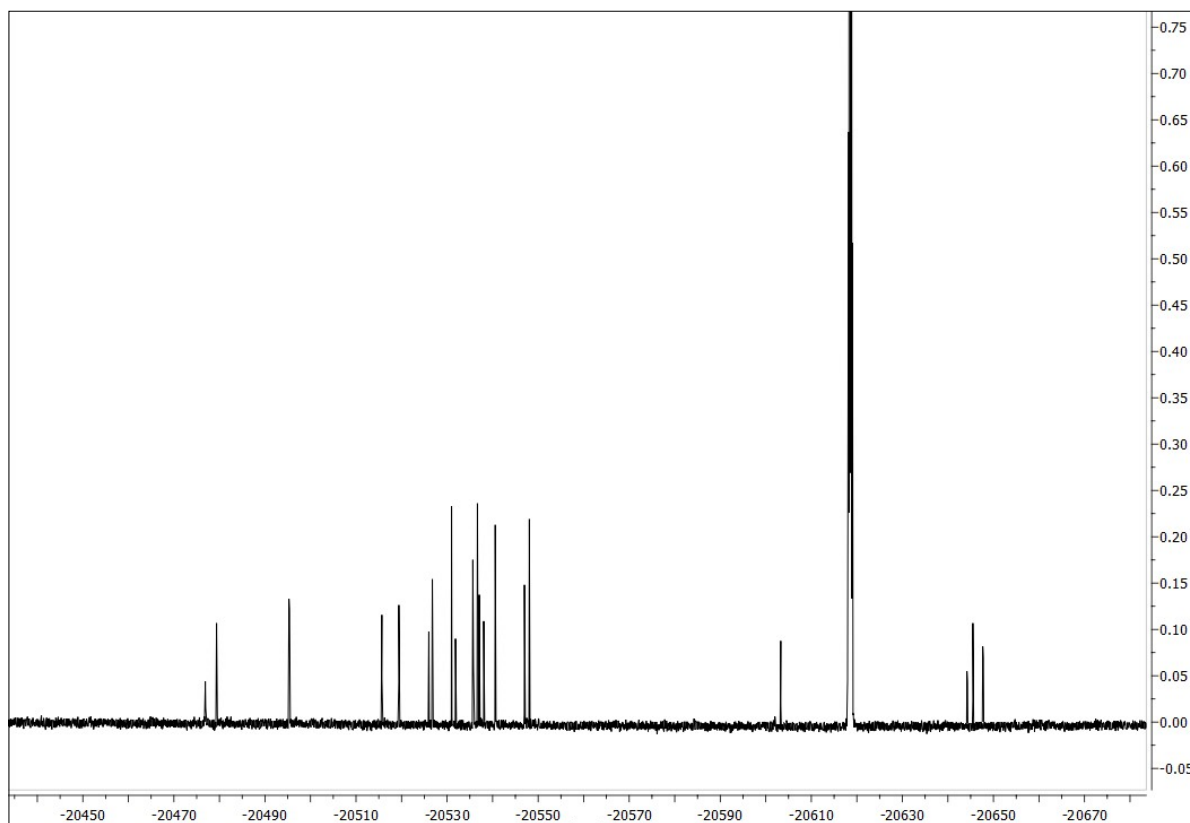

111

**FTIR, <sup>1</sup>H-NMR (500 MHz, DMSO), and <sup>13</sup>C-NMR (125 MHz, DMSO) spectra of compound 7a.**

112

113

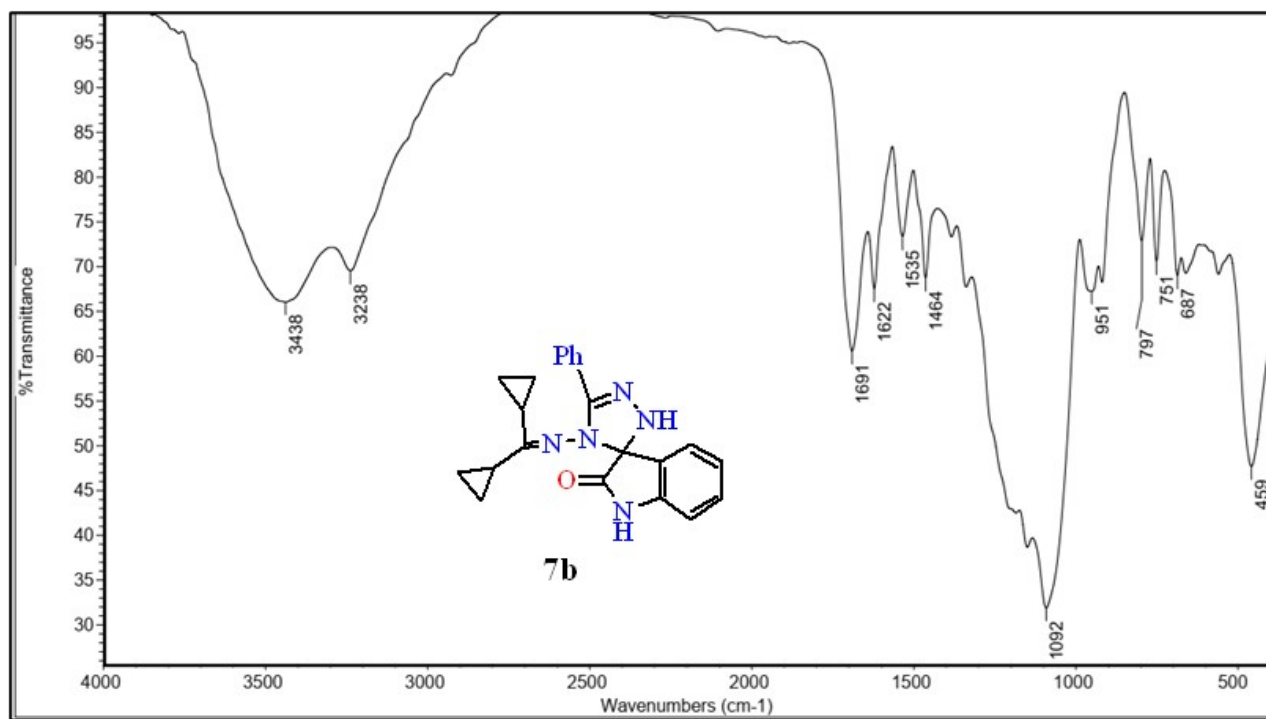

114

115

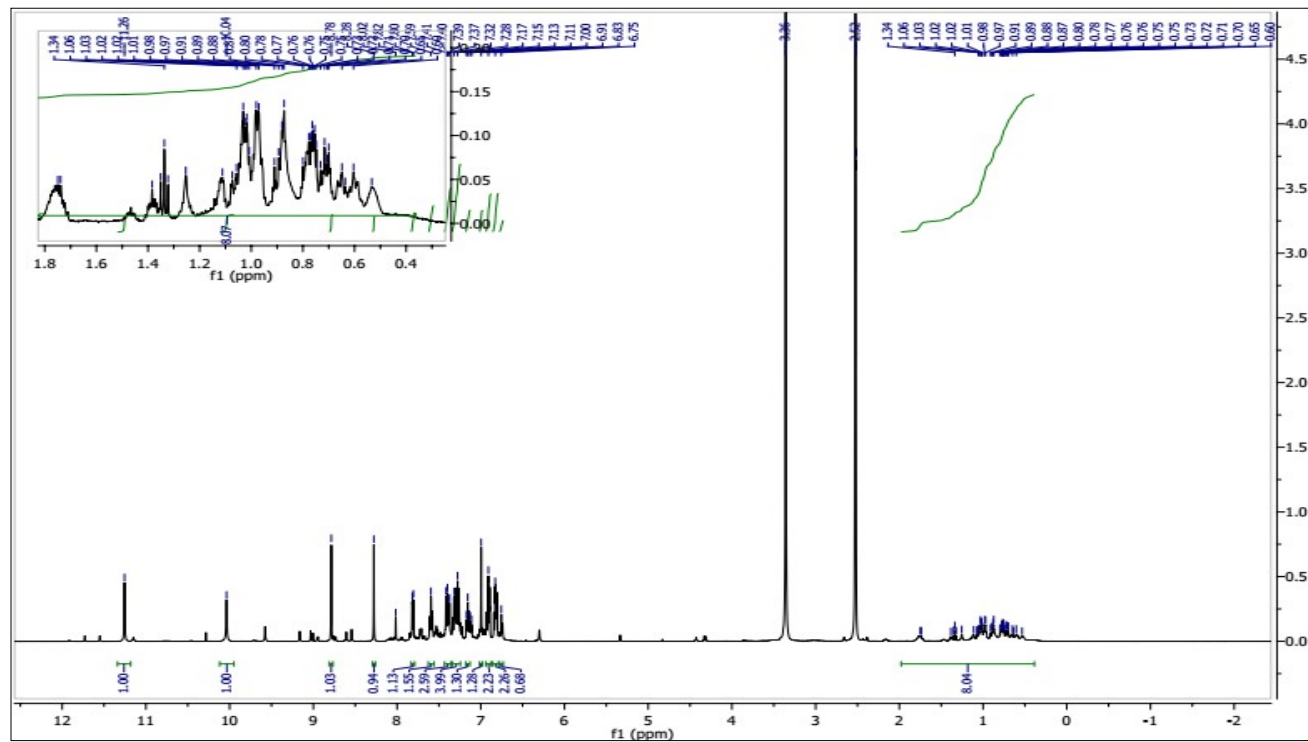

116

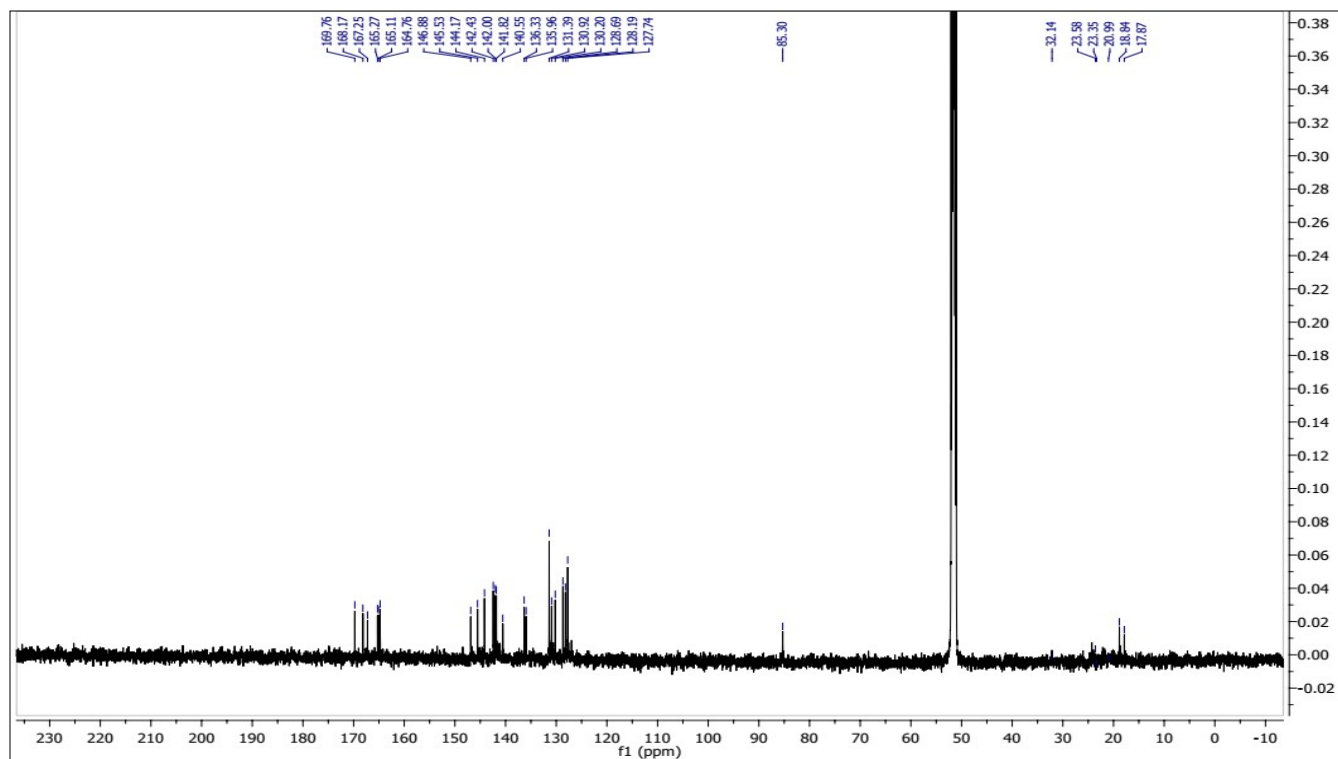

117

118

119

FTIR, <sup>1</sup>H-NMR (500 MHz, DMSO), and <sup>13</sup>C-NMR (125 MHz, DMSO) spectra of compound 7b.

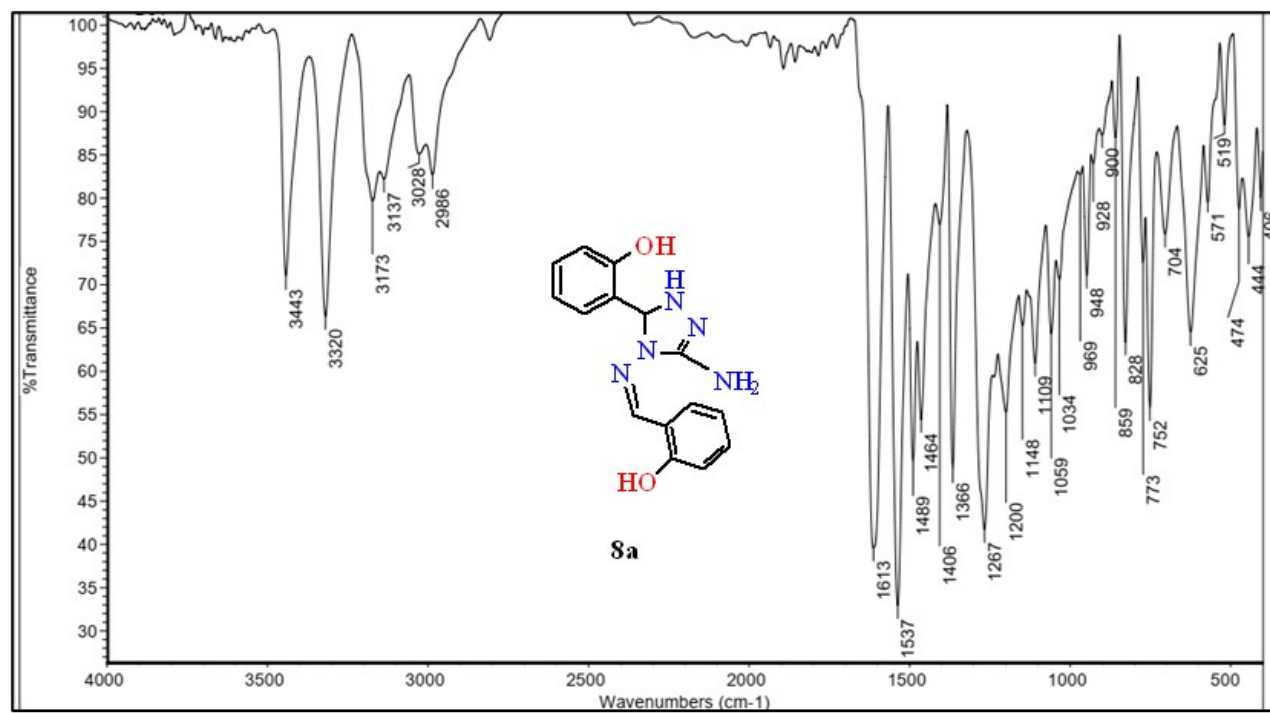

120

121

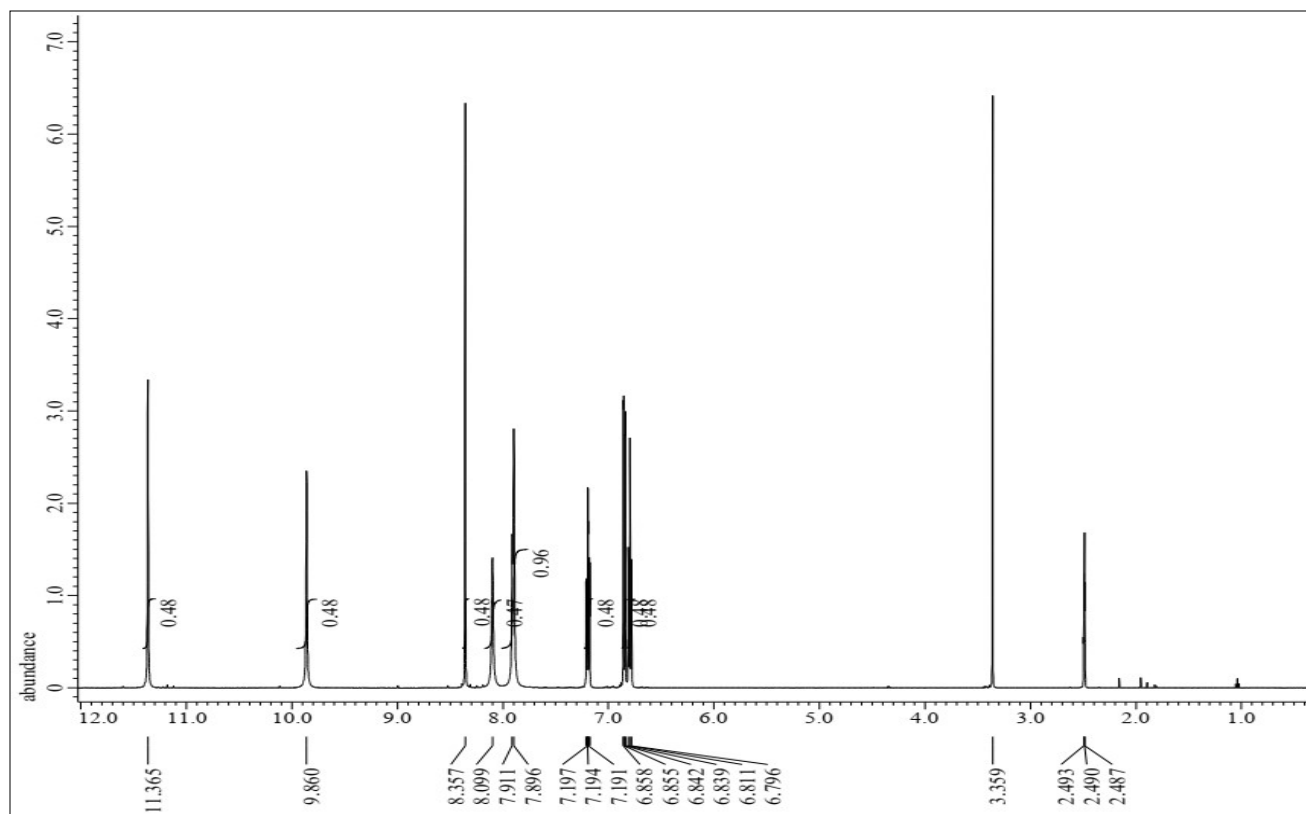

122

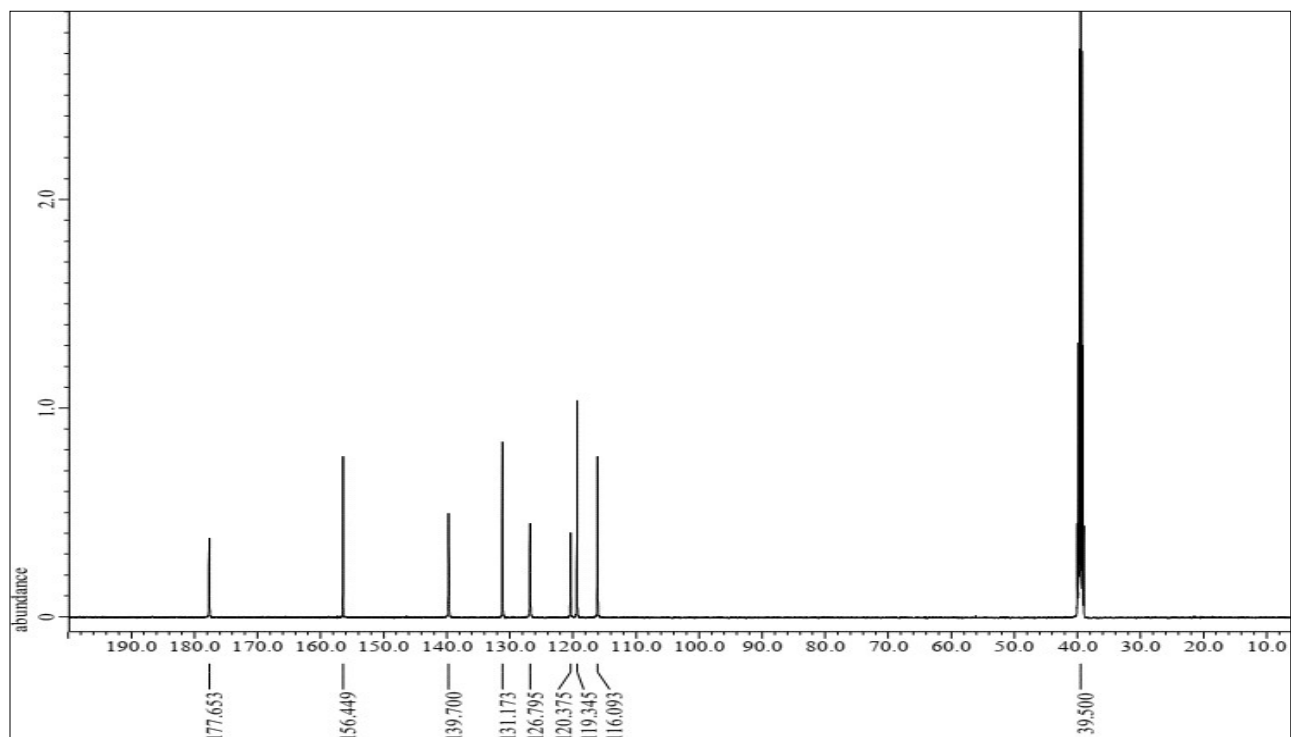

123

FTIR,  $^1\text{H-NMR}$  (500 MHz, DMSO), and  $^{13}\text{C-NMR}$  (125 MHz, DMSO) spectra of compound 8a.

124

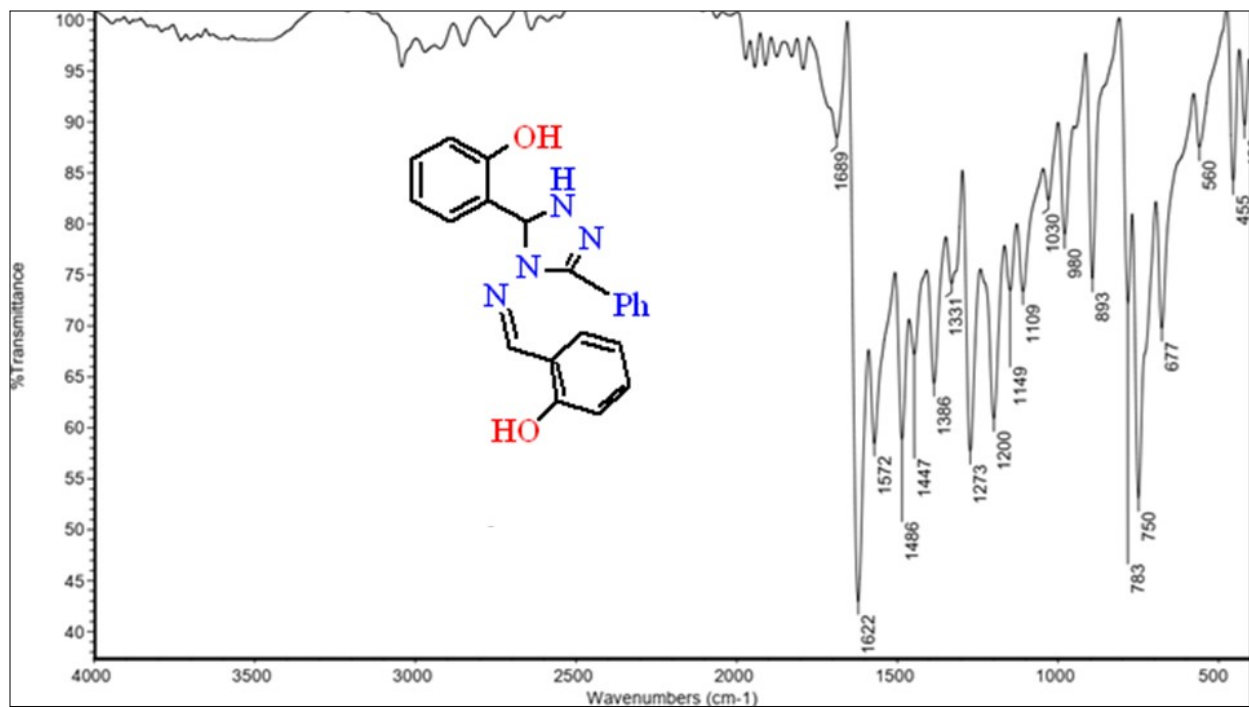

125

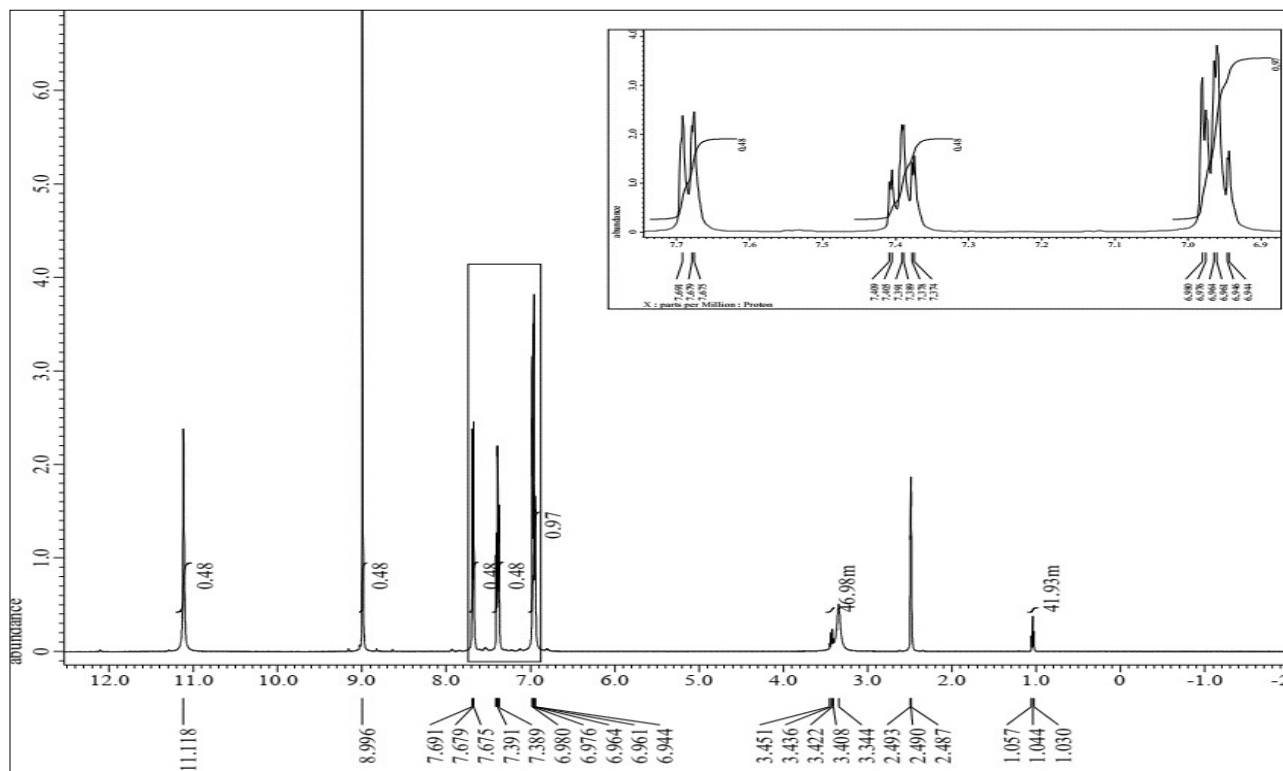

126

127

**FTIR, and  $^1\text{H-NMR}$  (500 MHz, DMSO) of compound 8b.**

128

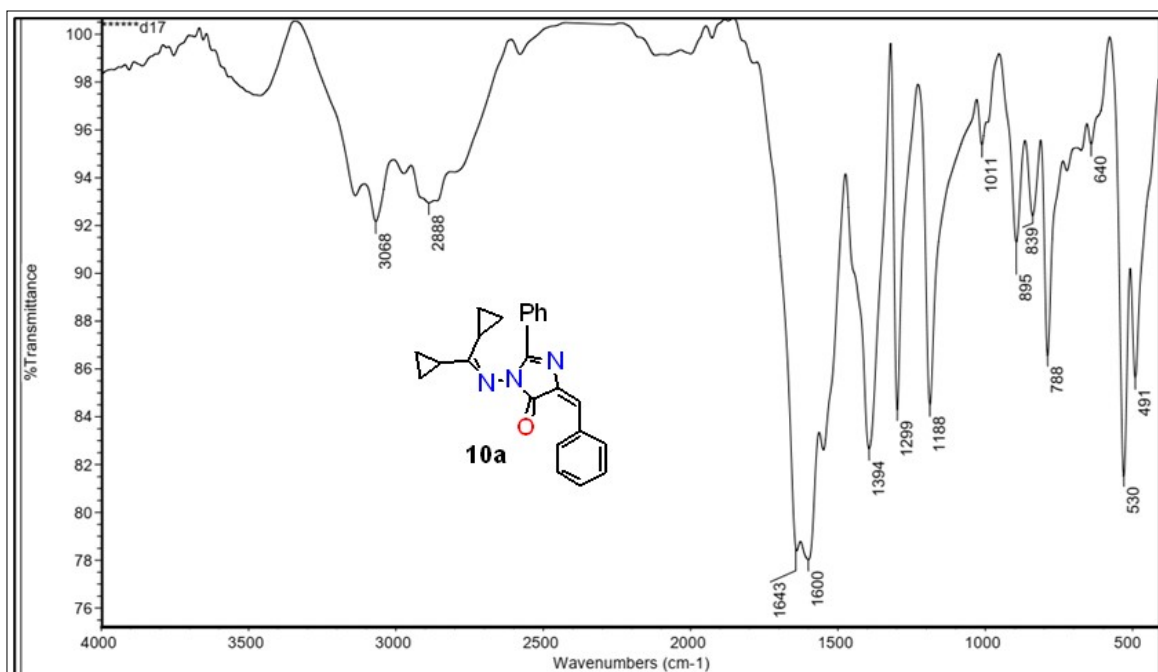

129

130

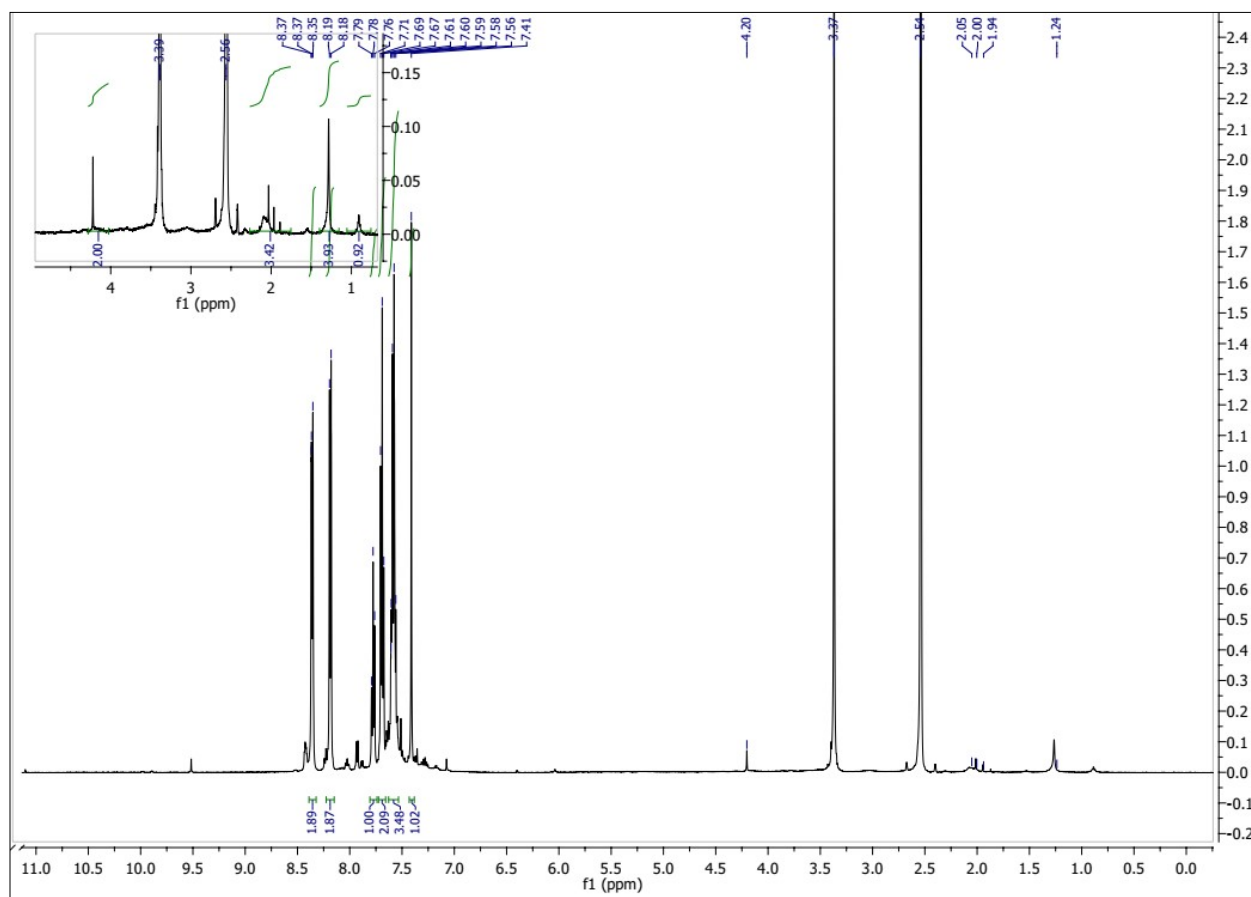

131



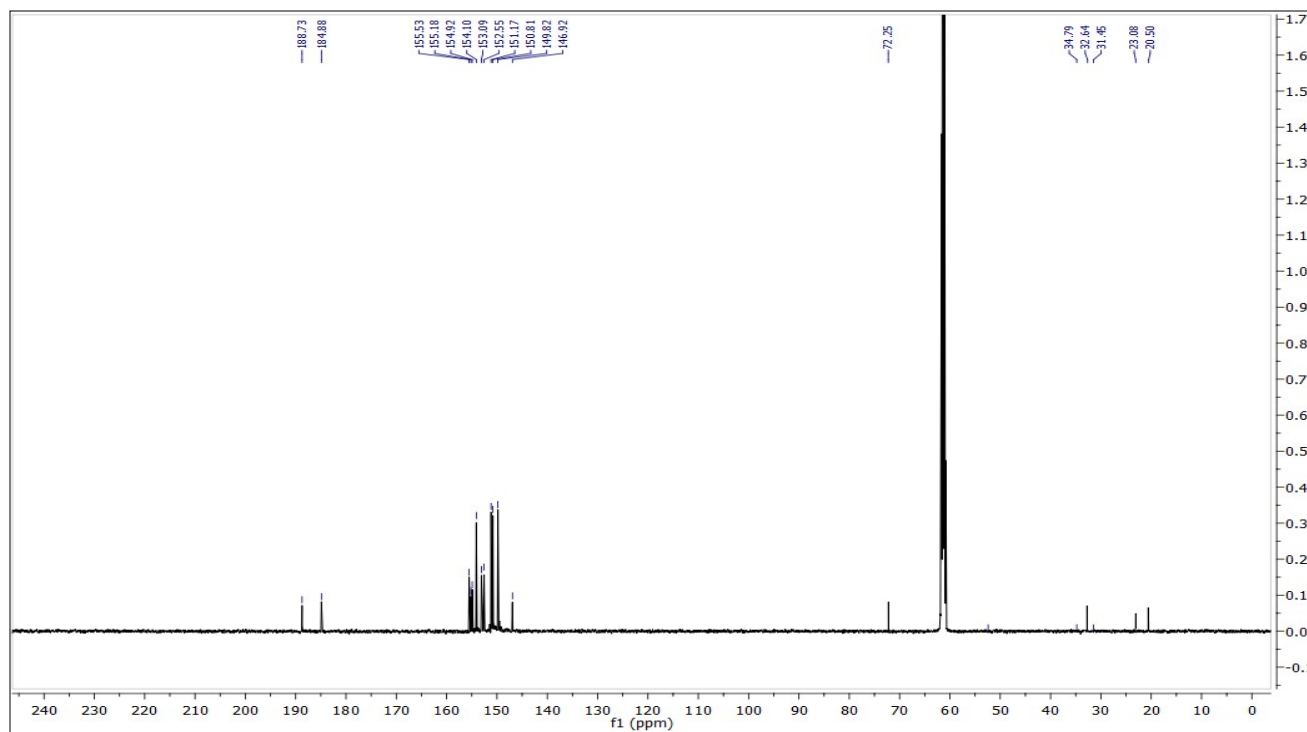

133 FTIR, <sup>1</sup>H-NMR (500 MHz, DMSO), and <sup>13</sup>C-NMR (125 MHz, DMSO) of compound 10a.

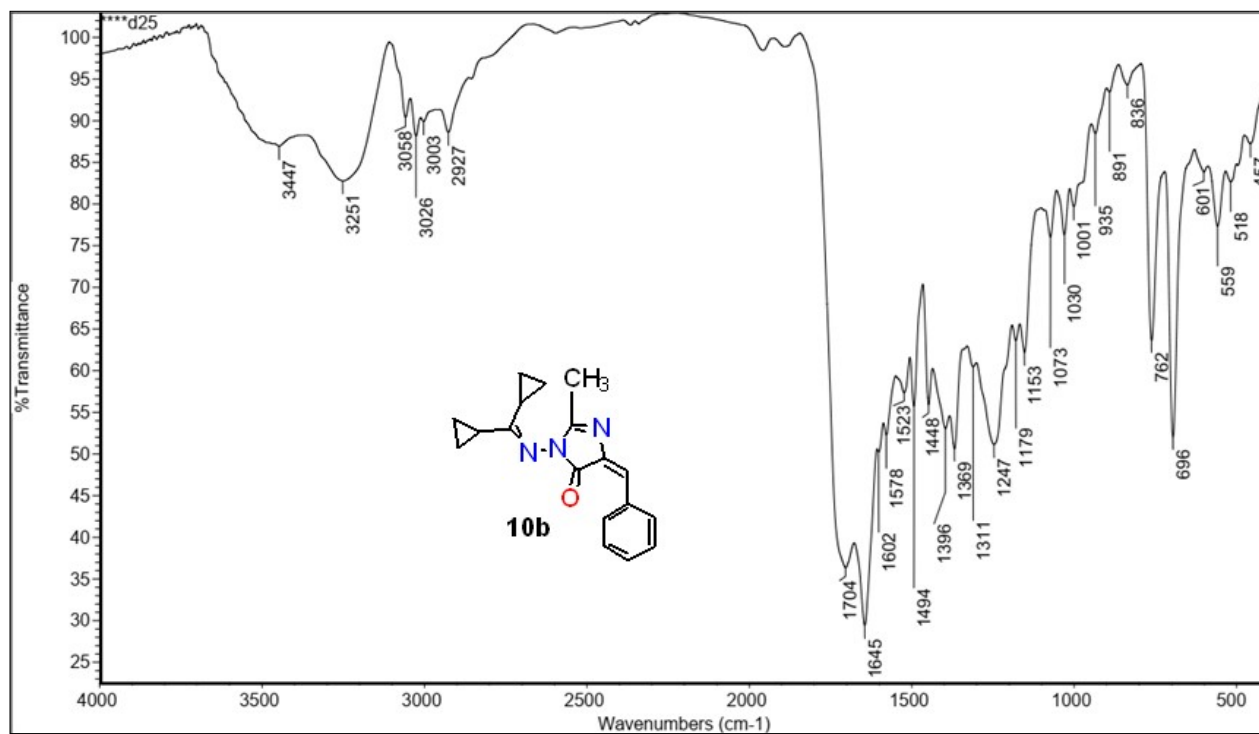

135

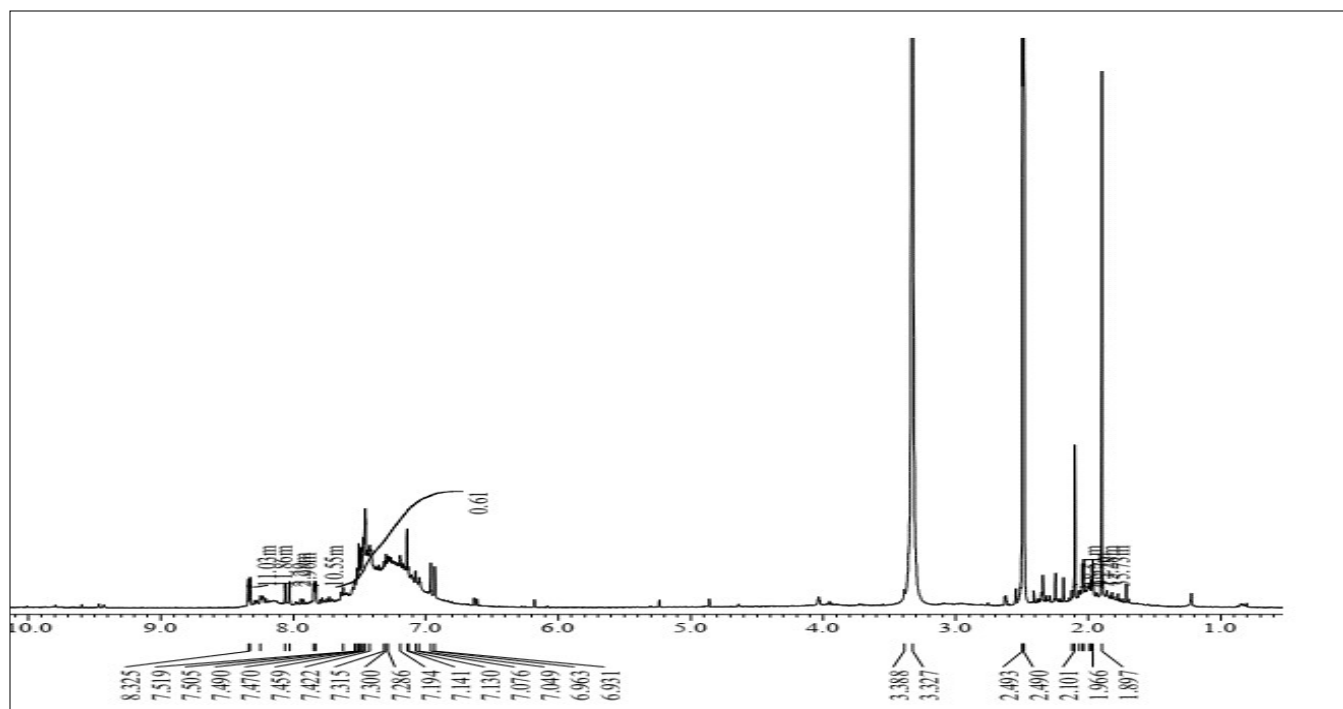

136

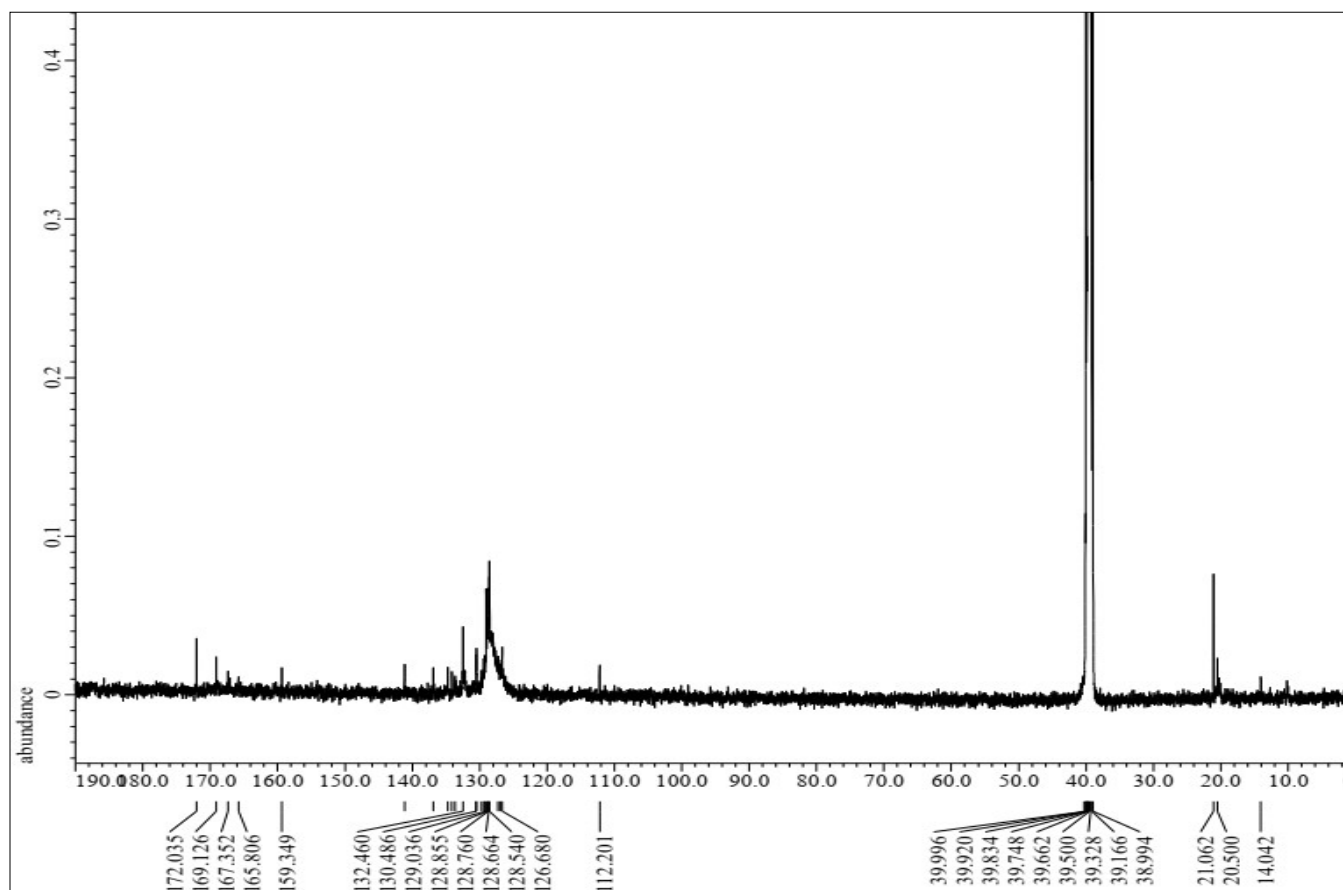

137

**FTIR,  $^1\text{H-NMR}$  (500 MHz, DMSO), and  $^{13}\text{C-NMR}$  (125 MHz, DMSO) of compound 10b.**

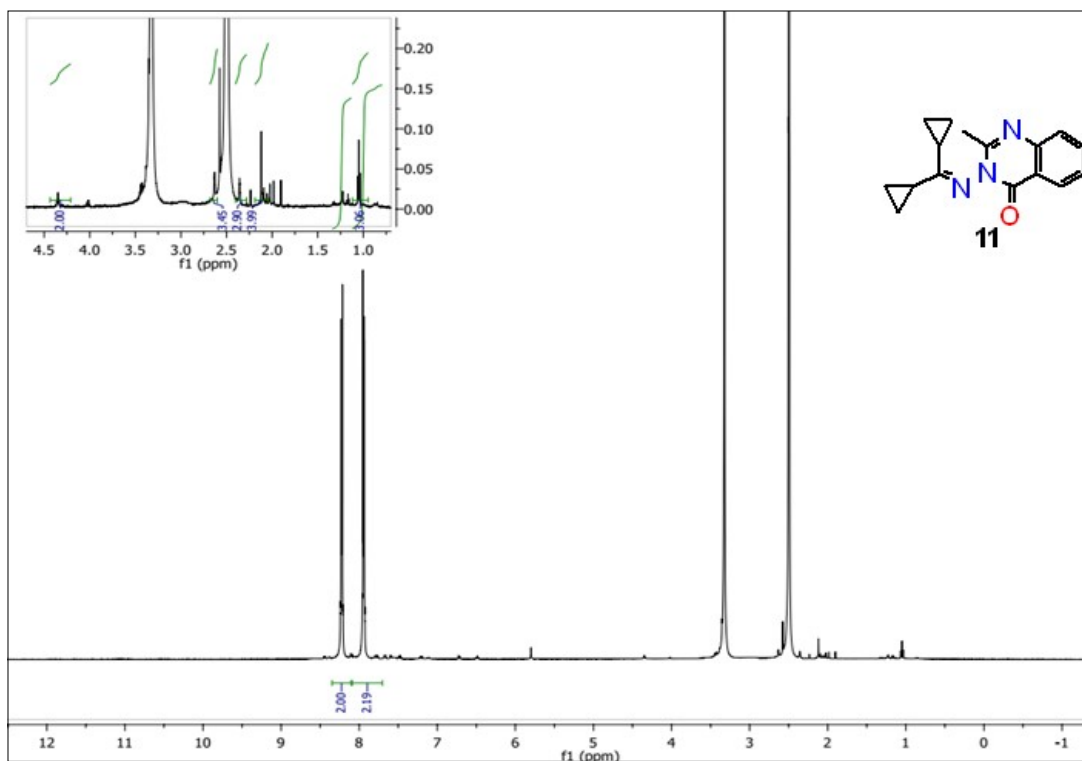

138

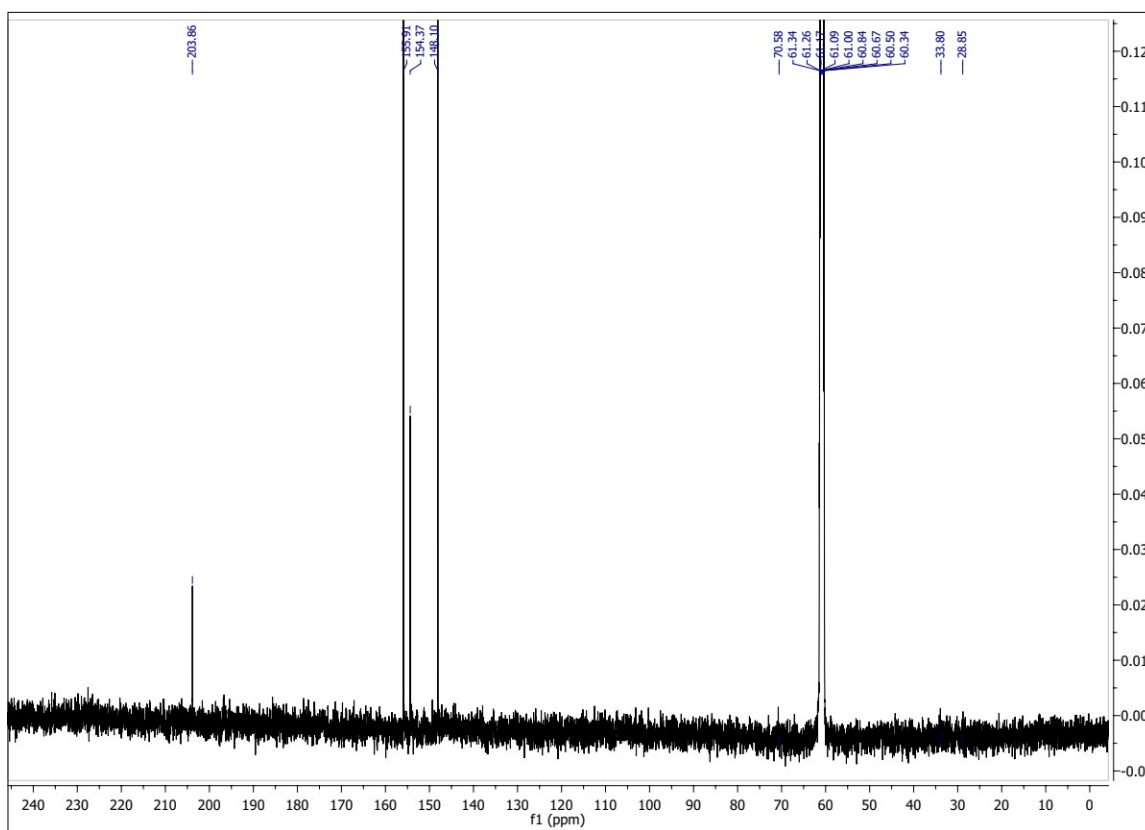

139

140

**<sup>1</sup>H-NMR (500 MHz, DMSO), and <sup>13</sup>C-NMR (125 MHz, DMSO) of compound 11.**

141

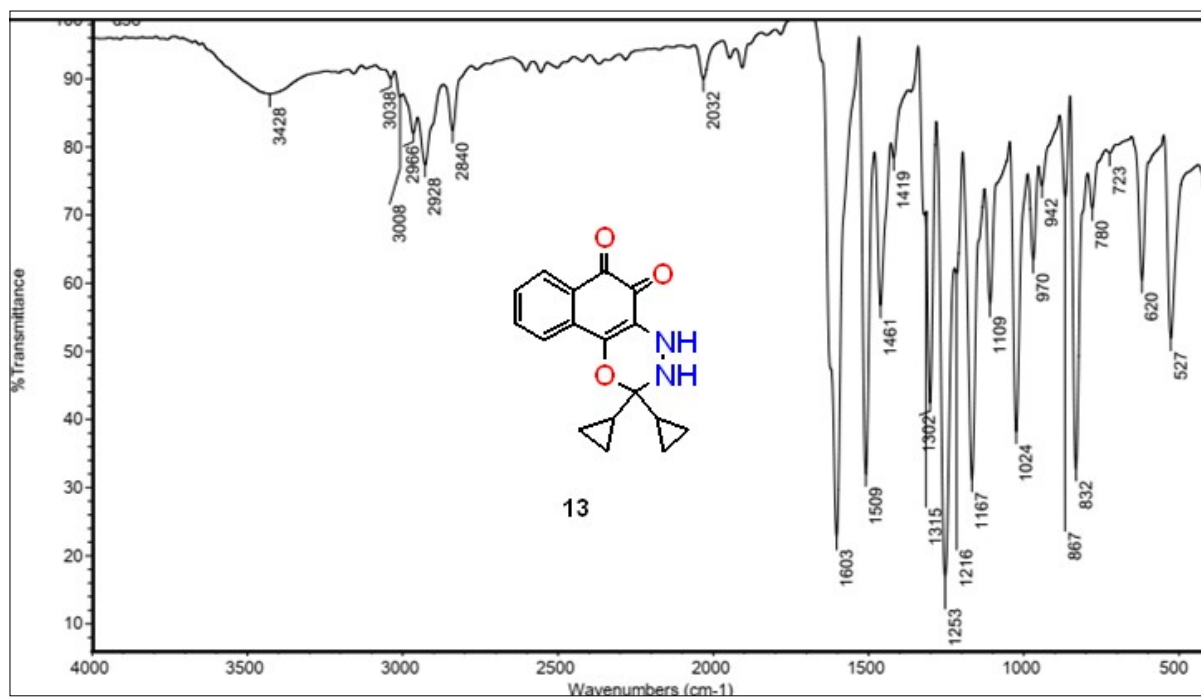

142

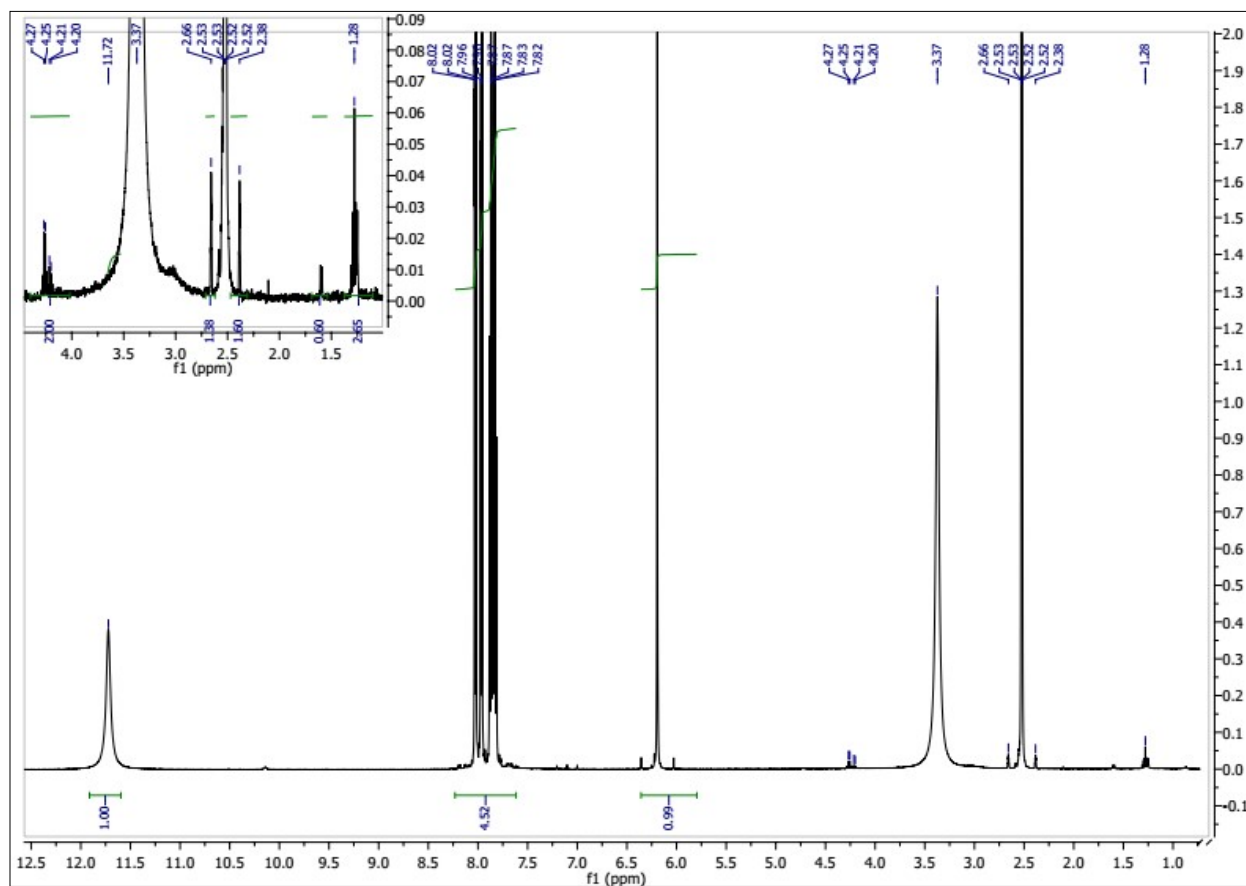

143

144

145

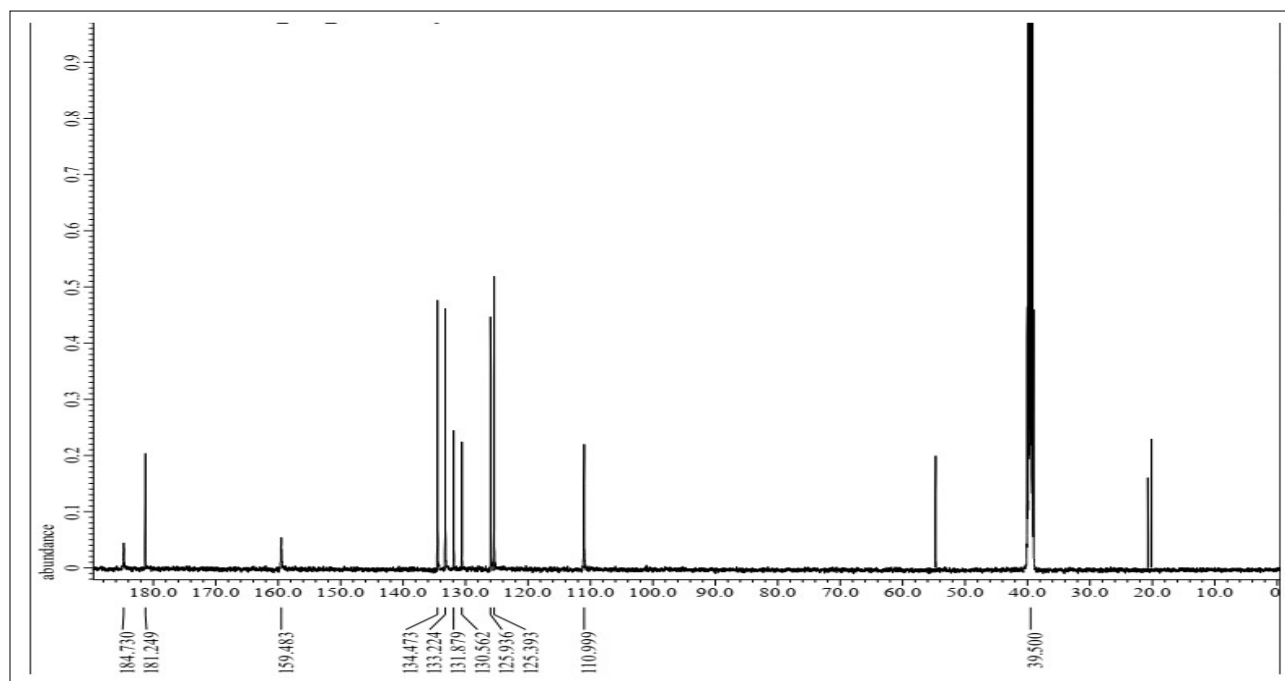

146

147

148 FTIR, <sup>1</sup>H-NMR (500 MHz, DMSO), and <sup>13</sup>C-NMR (125 MHz, DMSO) of compound 13.

149

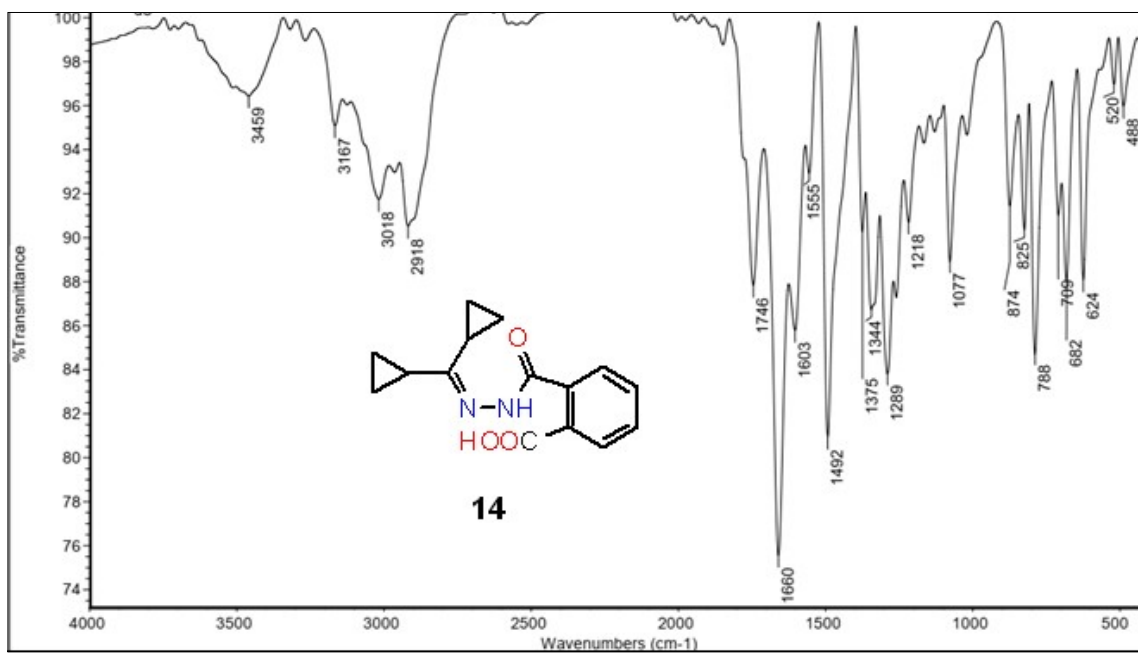

150

151

152

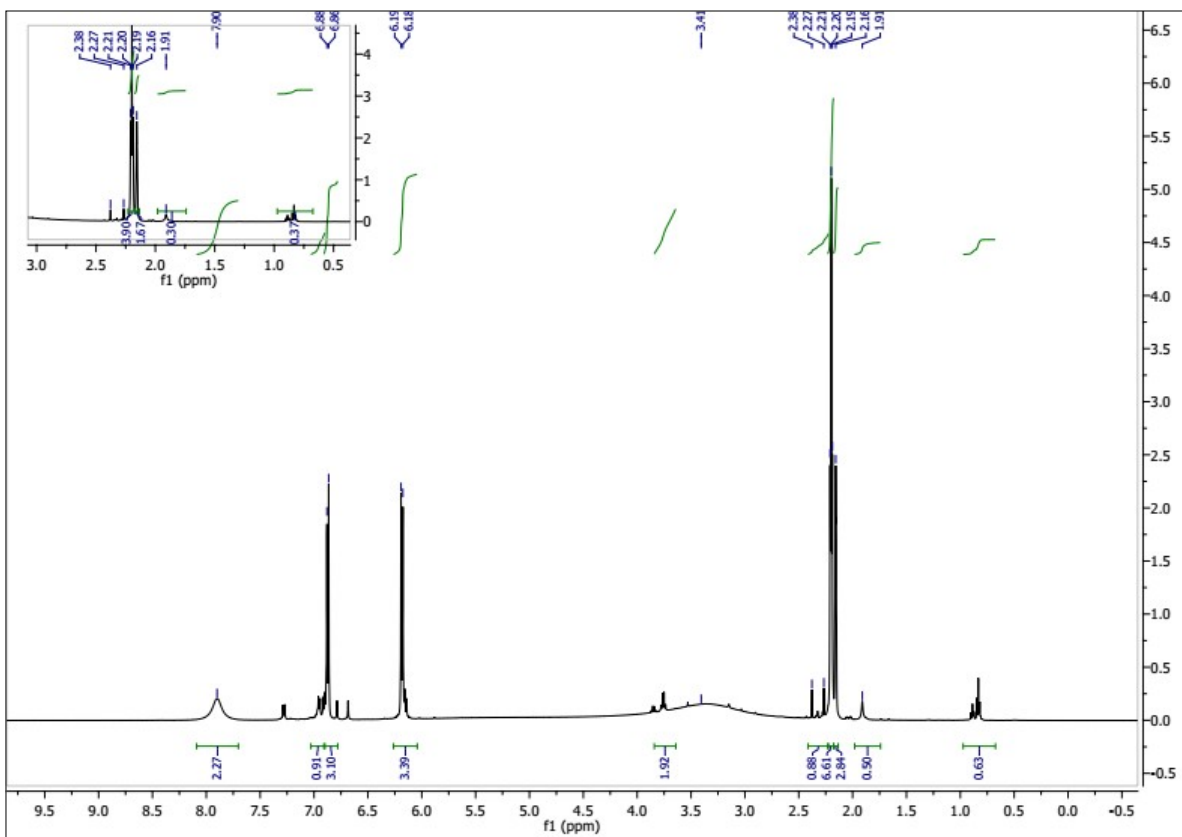

153

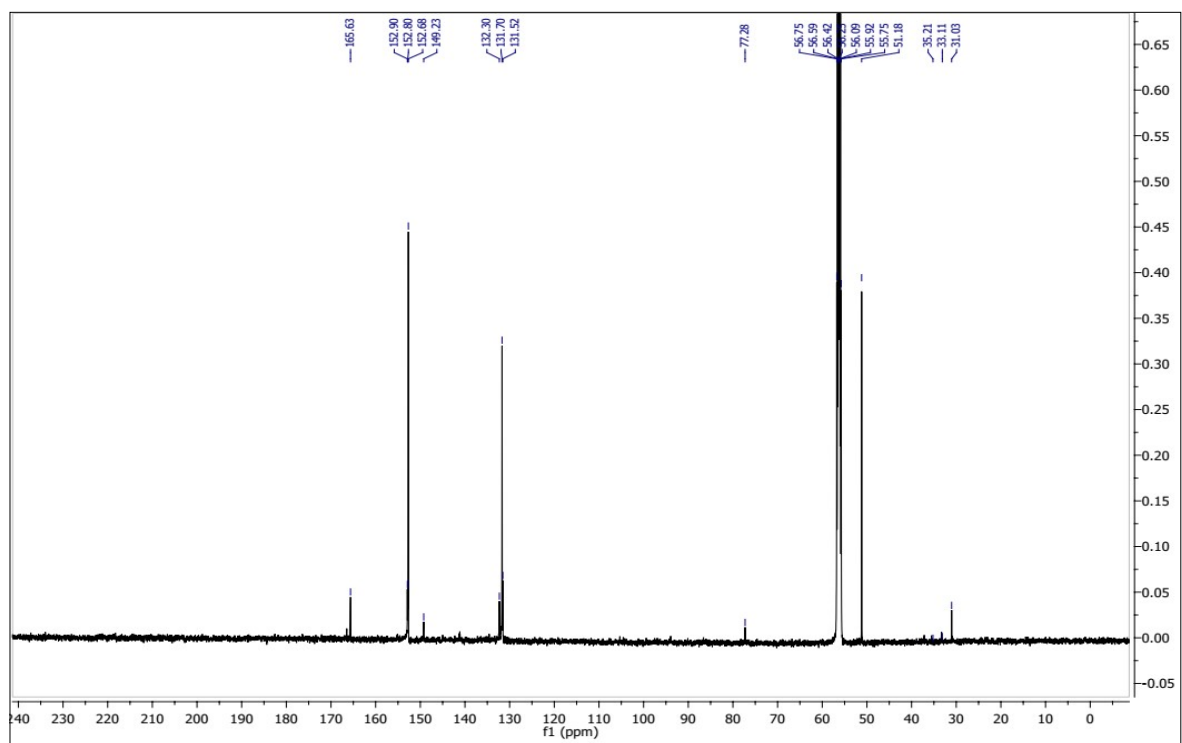

154

155 FTIR, <sup>1</sup>H-NMR (500 MHz, DMSO), and <sup>13</sup>C-NMR (125 MHz, DMSO) of compound 14.

156

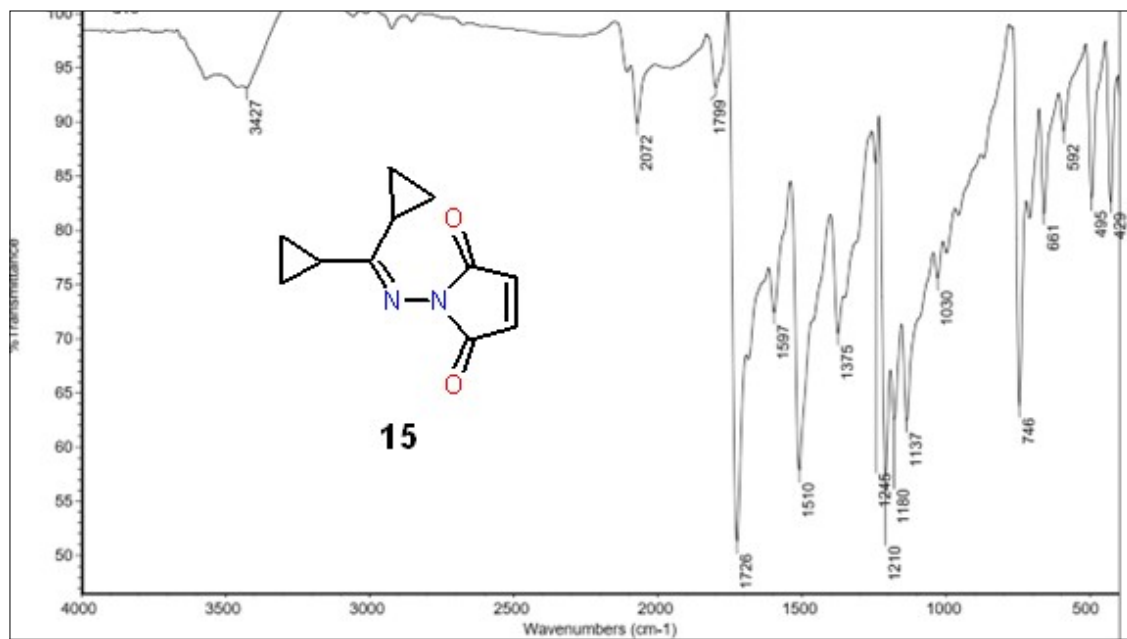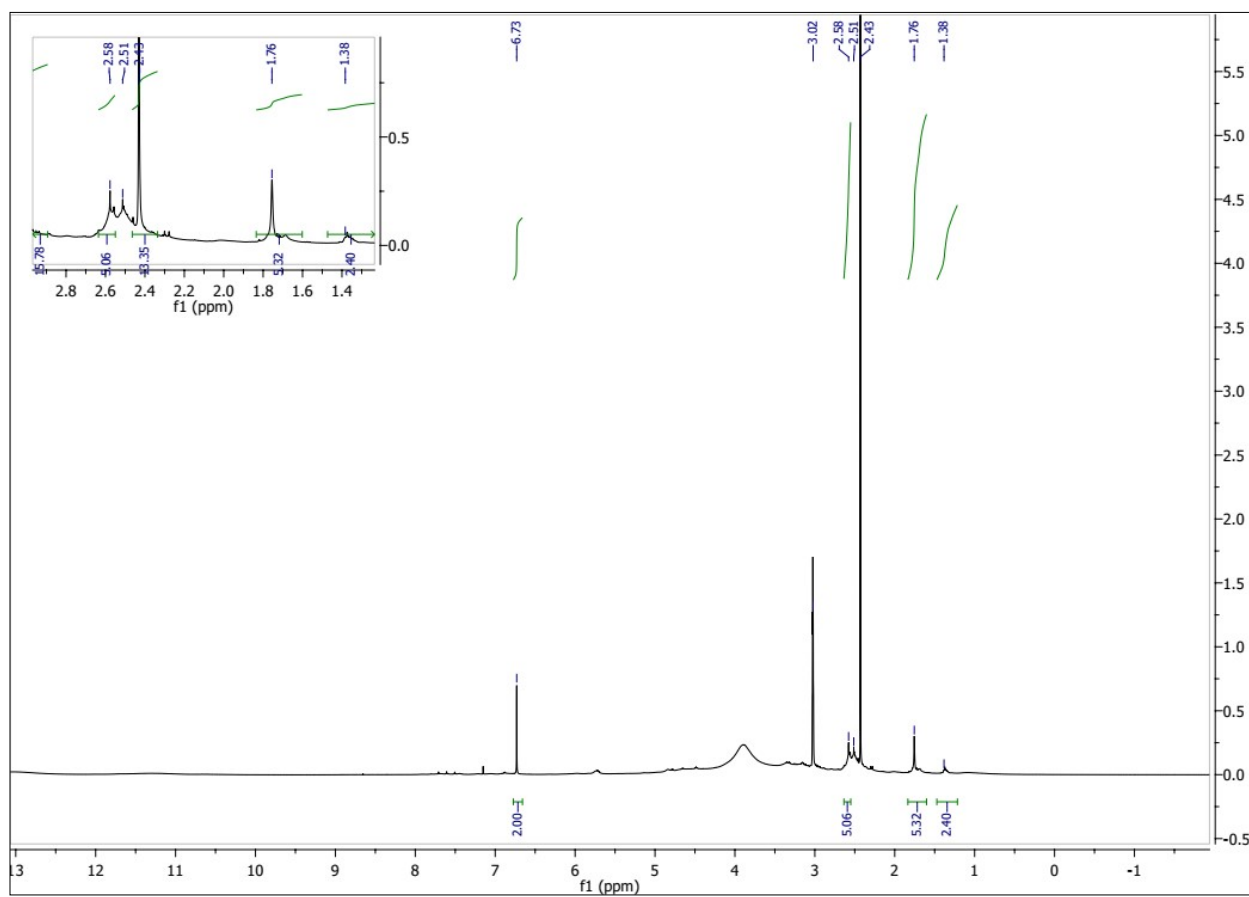

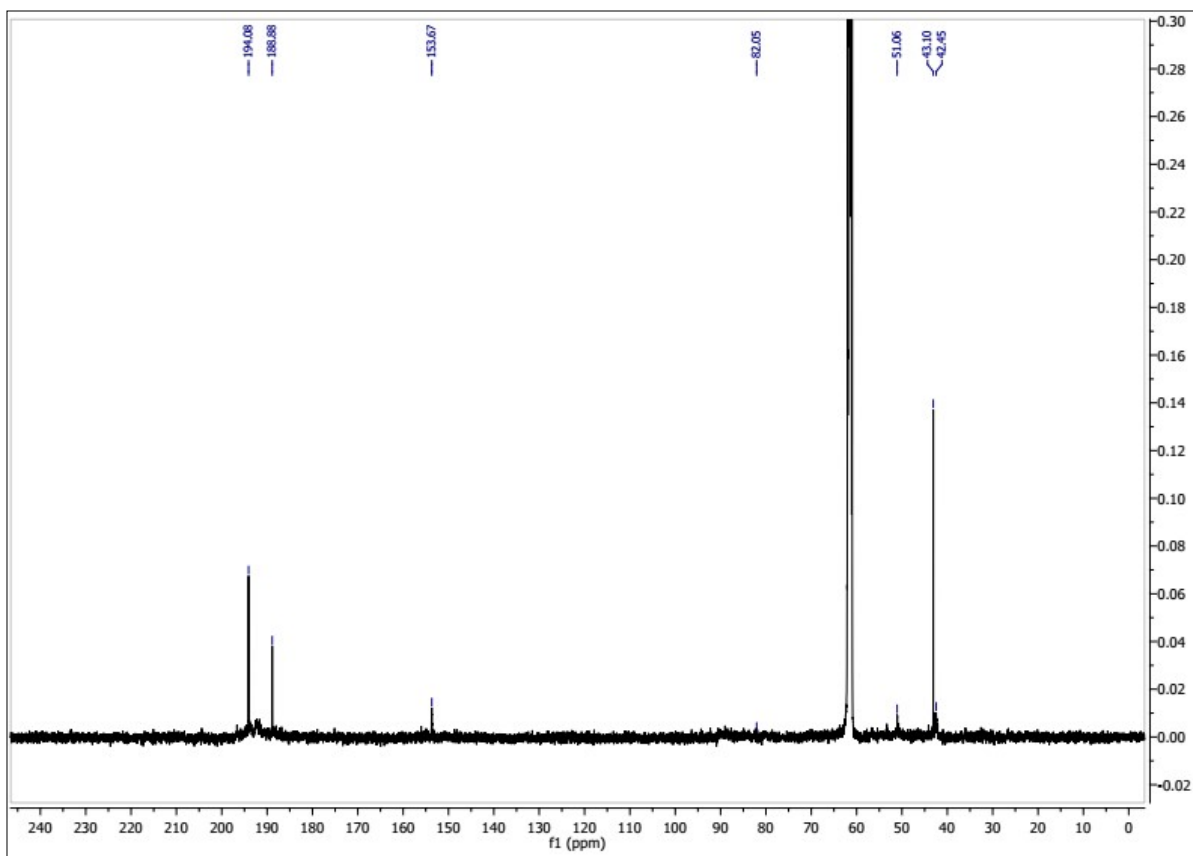

160

161 **FTIR,  $^1\text{H}$ -NMR (500 MHz, DMSO), and  $^{13}\text{C}$ -NMR (125 MHz, DMSO) of compound 15.**

162

163

164

165

166

167

168

169

170

171

172

173

174



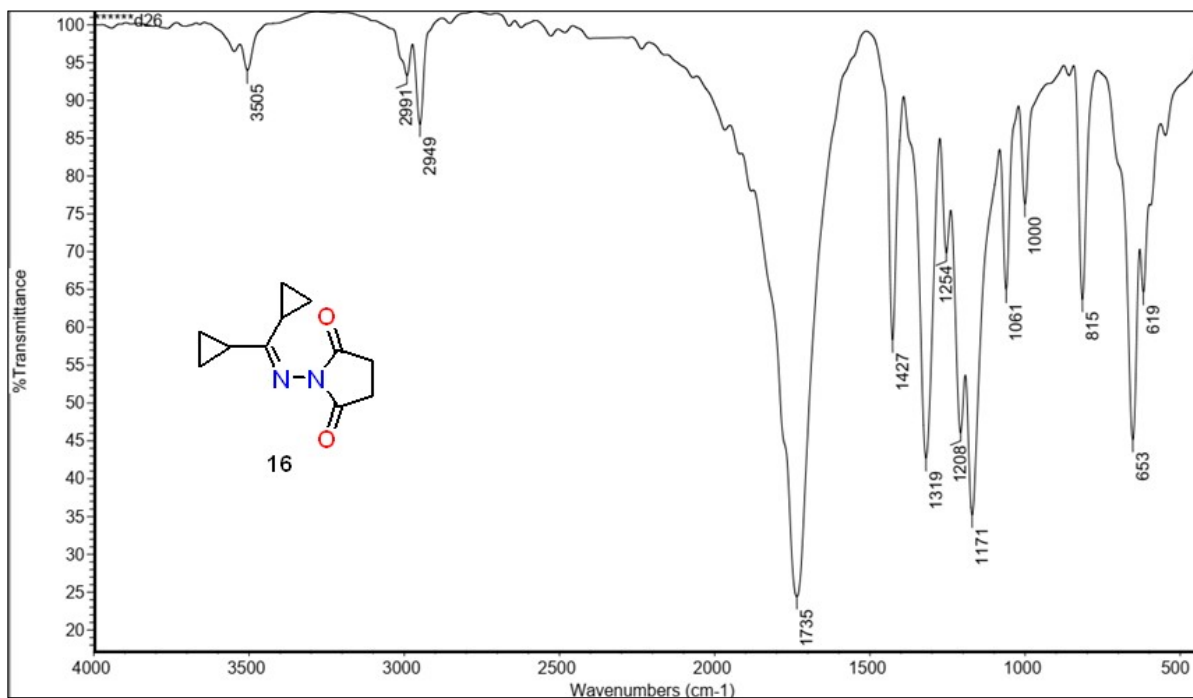

175

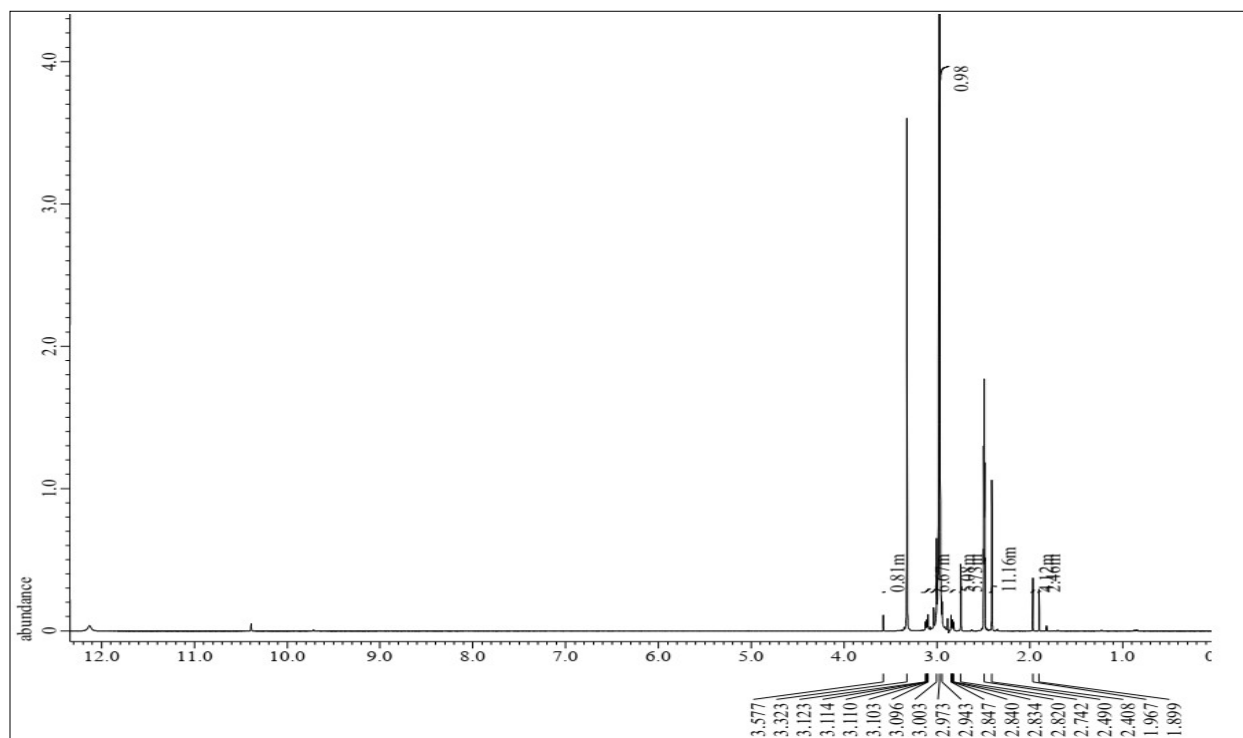

176

177

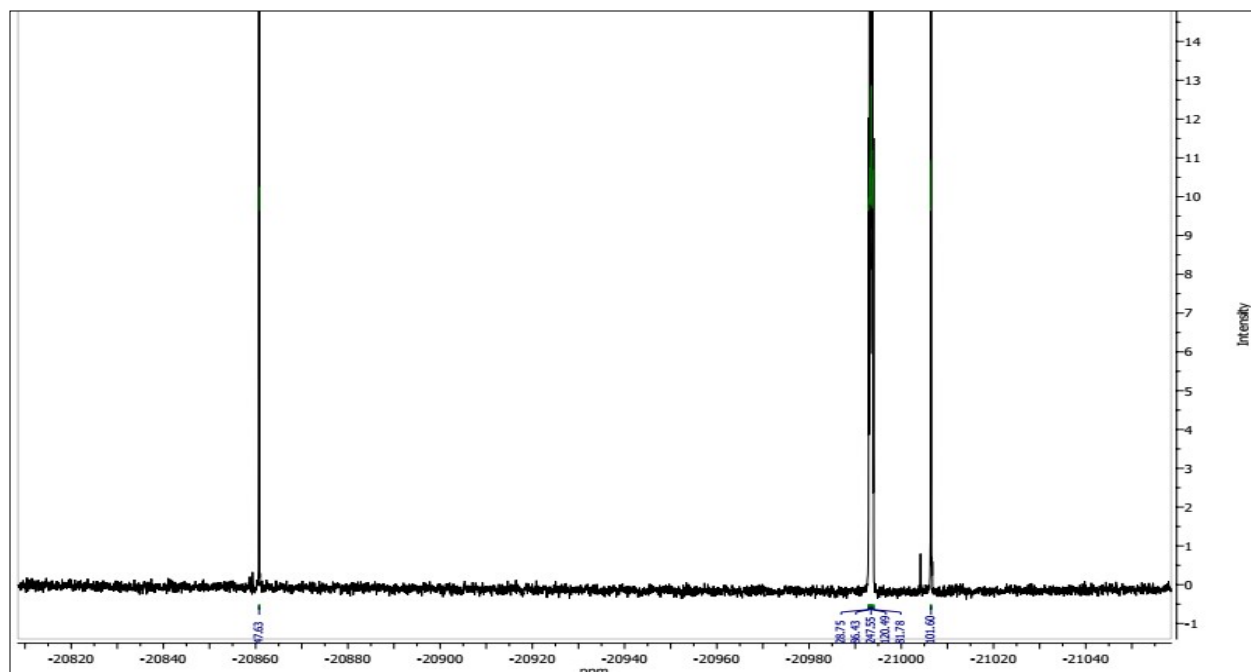

178

179 FTIR, <sup>1</sup>H-NMR (500 MHz, DMSO), and <sup>13</sup>C-NMR (125 MHz, DMSO) of compound 16.

180

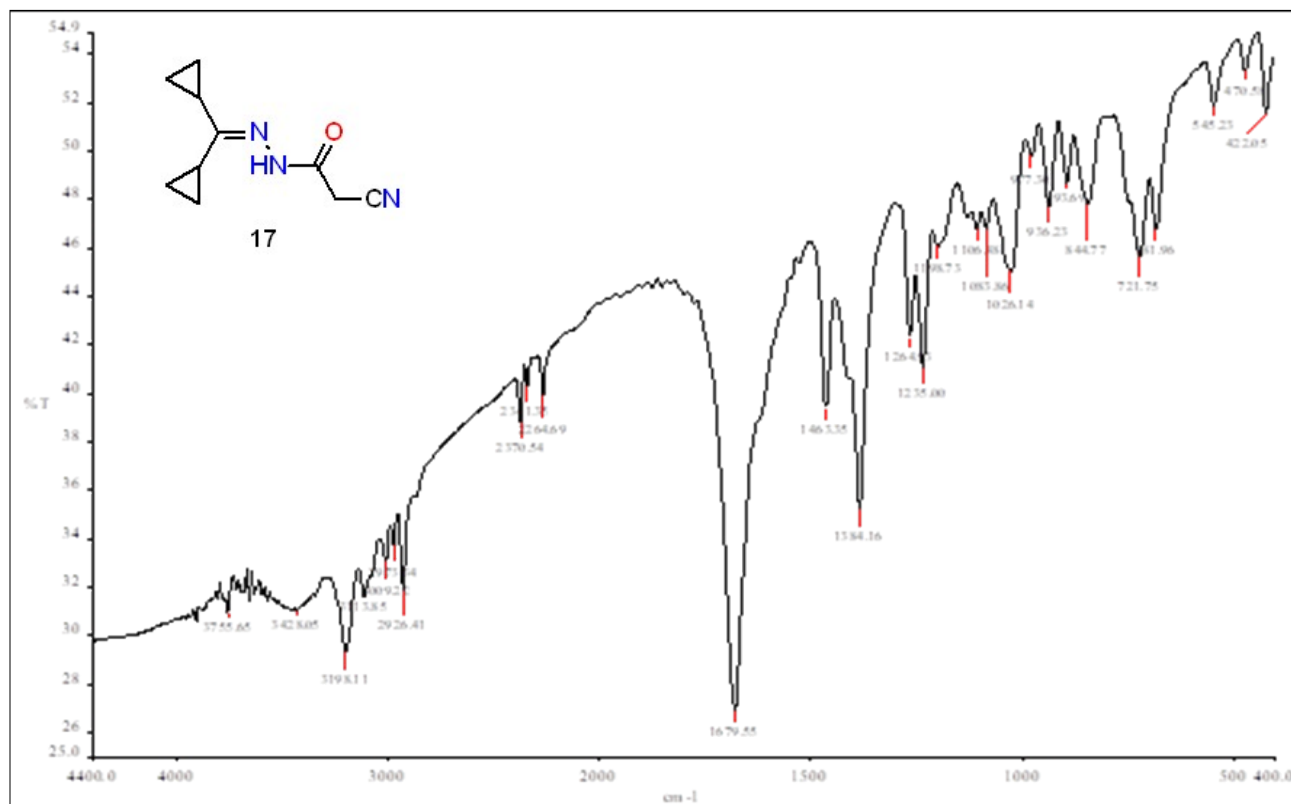

181

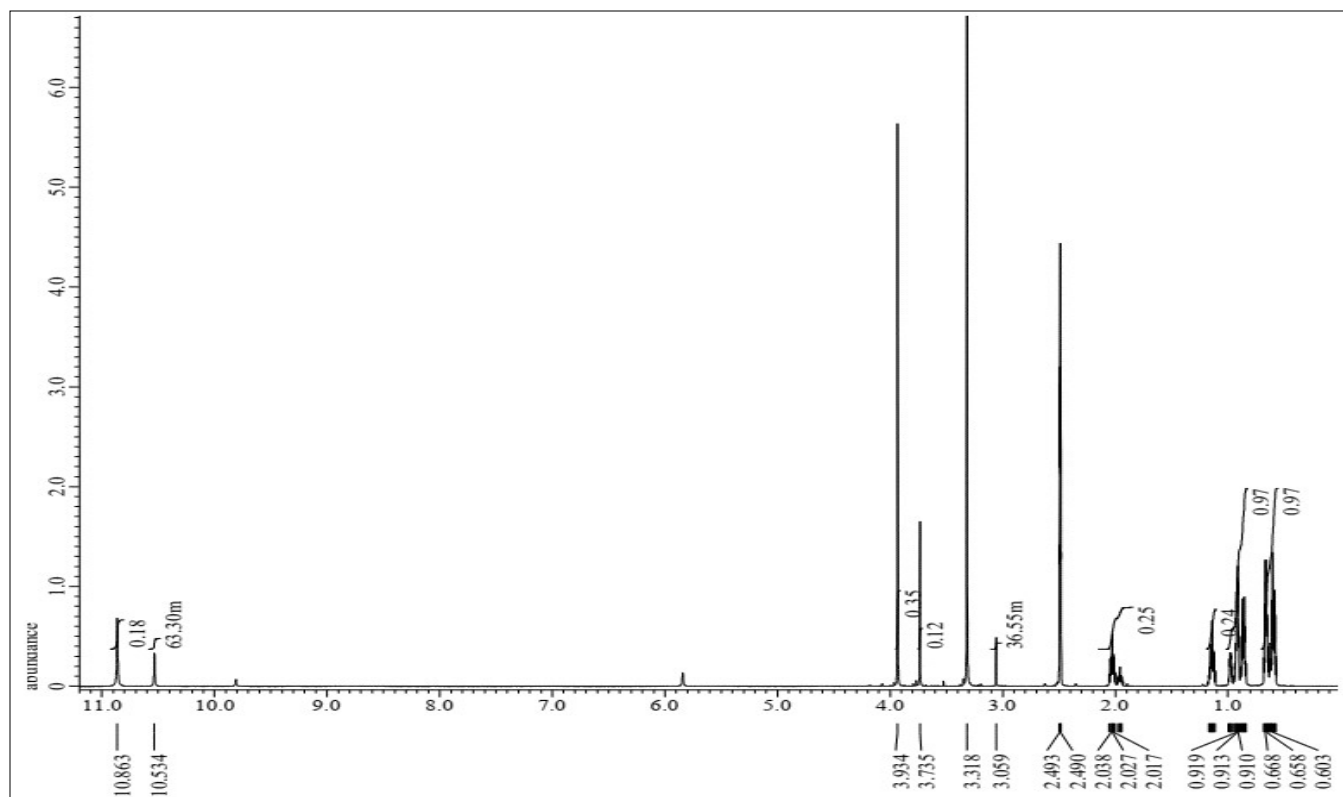

182

183

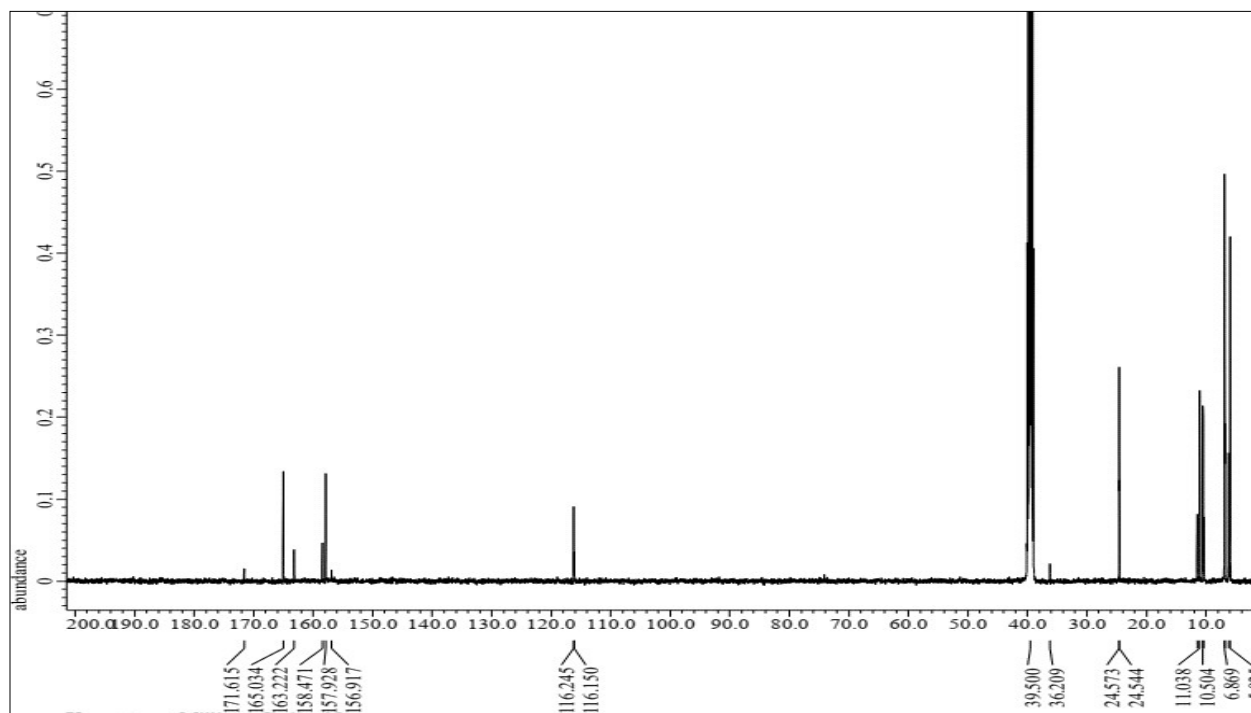

184

185 FTIR, <sup>1</sup>H-NMR (500 MHz, DMSO), and <sup>13</sup>C-NMR (125 MHz, DMSO) of compound 17.

186

187

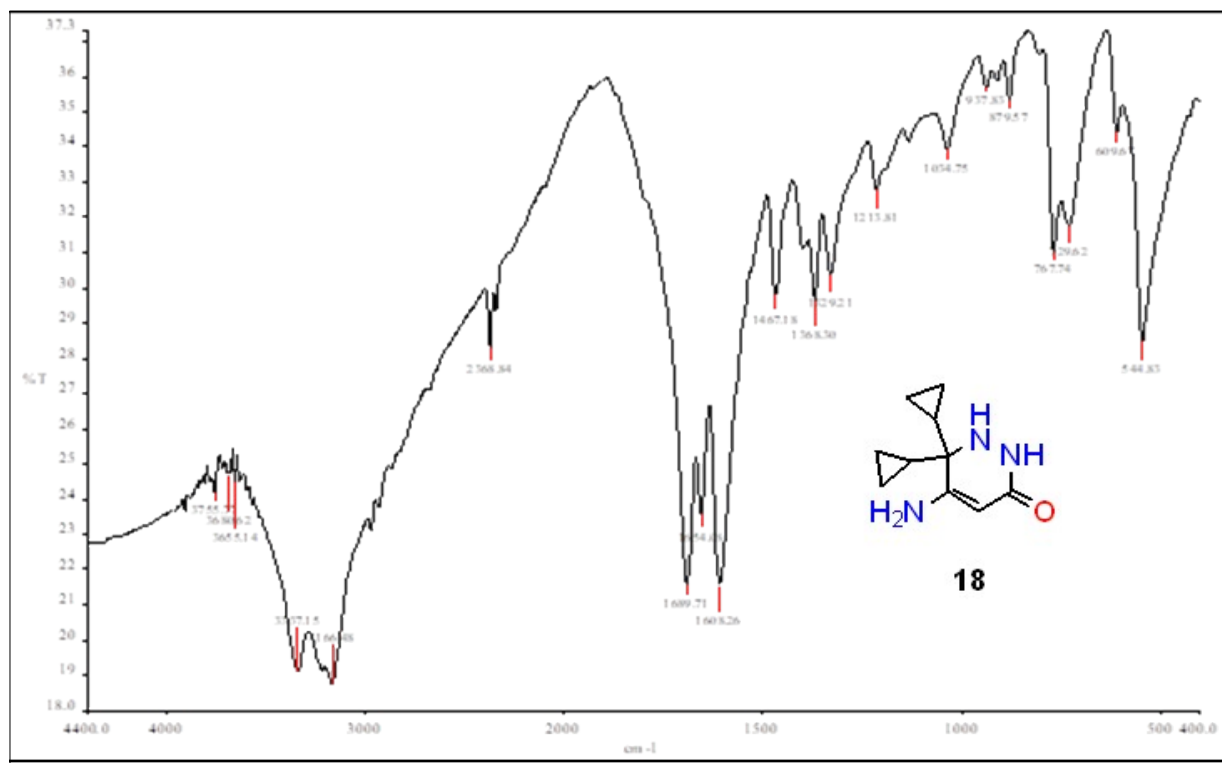

188

189

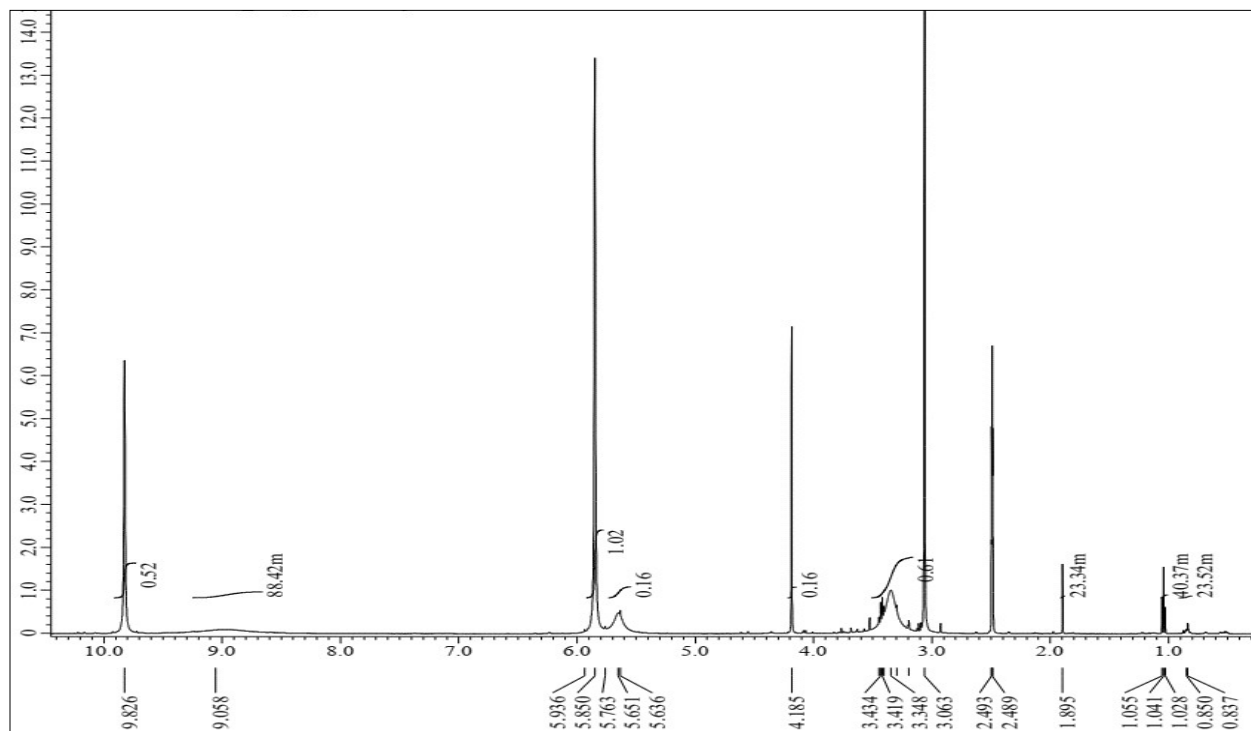

190

191

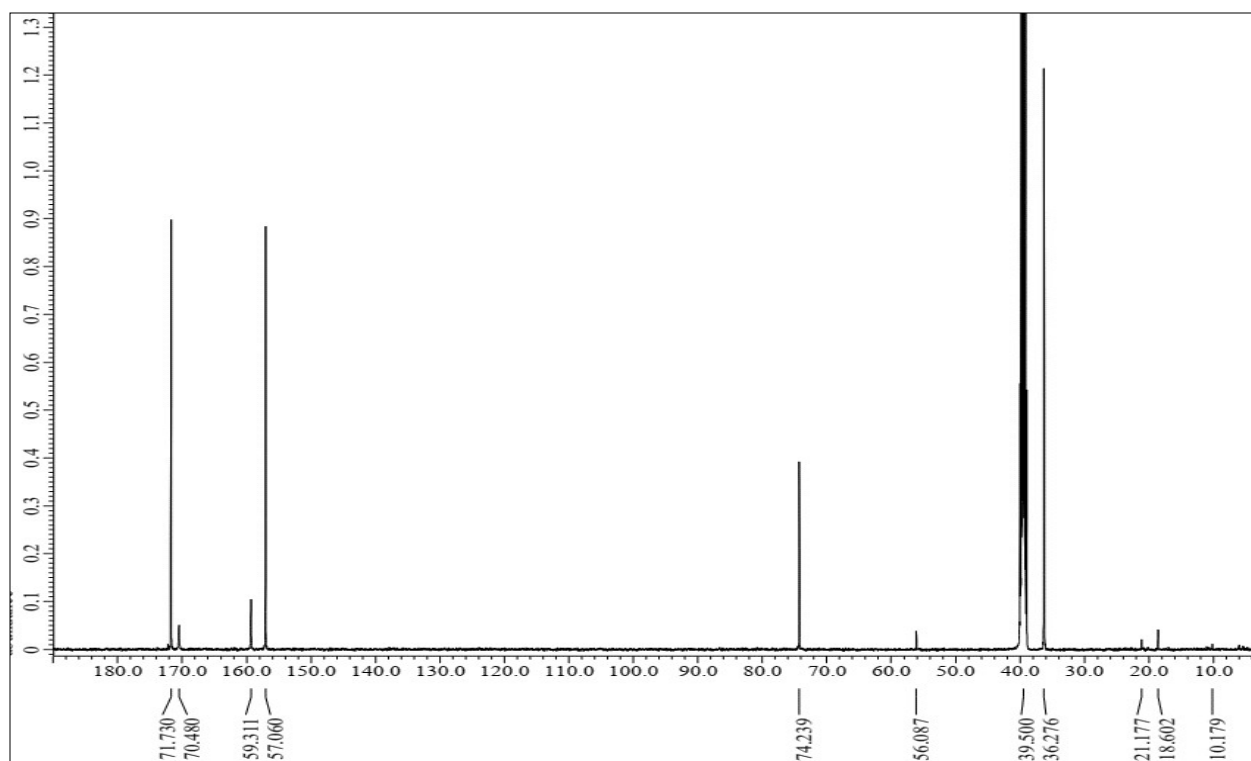

192

193 **FTIR, <sup>1</sup>H-NMR (500 MHz, DMSO), and <sup>13</sup>C-NMR (125 MHz, DMSO) of compound 18.**

194

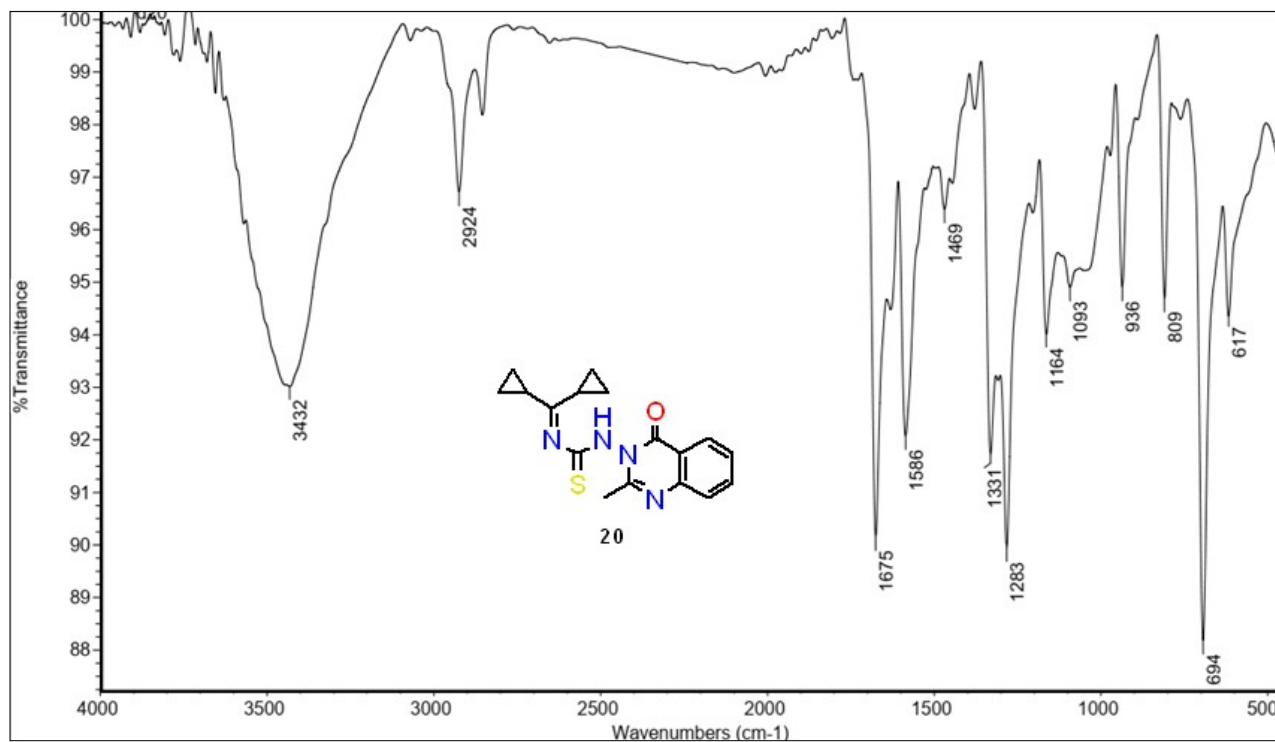

195

196

197

198

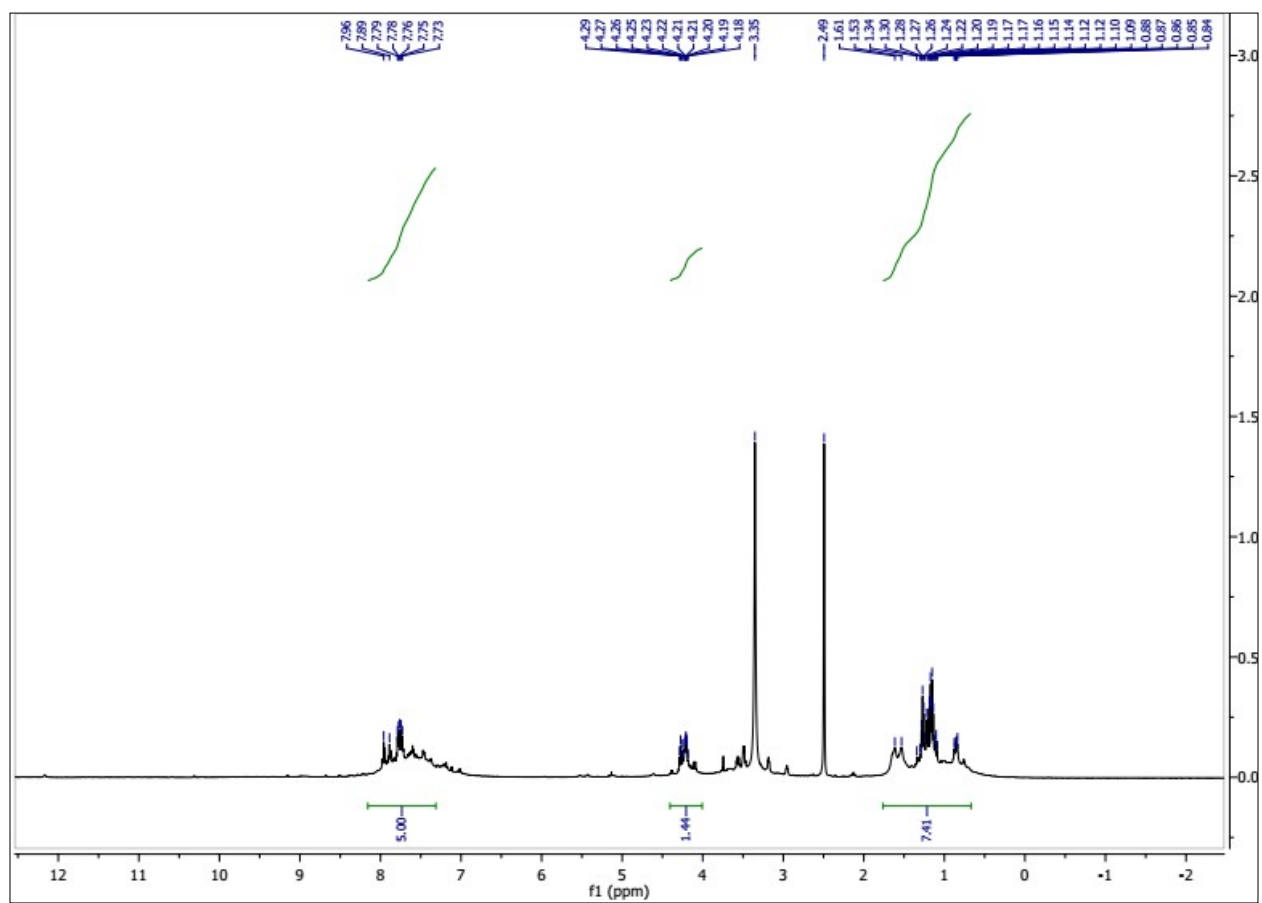

199

200

201 **FTIR, and <sup>1</sup>H-NMR (500 MHz, DMSO) of compound 20**

202

203

204

205

206

207

208

209

210

**Table S1:** Physicochemical properties and spectroscopy data of the synthesized compounds.

| <b>compound</b> | <b>Color</b><br><b>Recrystallization</b><br><b>solvent</b> | <b>Yield</b><br><b>%</b> | <b>Mp</b><br><b>C</b> | <b>IR (KBr, v/cm<sup>-1</sup>),</b><br><b><sup>1</sup>H, <sup>13</sup>C NMR (DMSO-d<sub>6</sub>, δ ppm).</b><br><b>MS (EI): (m/z, %)</b>                                                                                                                                                                                     |
|-----------------|------------------------------------------------------------|--------------------------|-----------------------|------------------------------------------------------------------------------------------------------------------------------------------------------------------------------------------------------------------------------------------------------------------------------------------------------------------------------|
| 2               | White needles<br>(ethanol)                                 | 92%;                     | 85                    | <b>IR : 3425, 3395 (NH<sub>2</sub>), 1604 (C=N).</b><br><b><sup>1</sup>H NMR: 0.6-1.07 (m, 8H, 4CH<sub>2</sub>), 2.25 (m, 4H, 2CH, NH<sub>2</sub>).</b><br><b><sup>13</sup>C-NMR: 5.6, 7.24, 9.36, 11.45 and 165.8.</b><br><b>MS (EI): (m/z, %), 124 (M<sup>+</sup>-1, 1), 108 (100).</b>                                    |
| 3a              | yellow needles<br>(Ethanol)                                | 78                       | 164-6                 | <b>IR: 2967-2840 (CH aliphatic), 1659, 1600 (2C=N).</b><br><b>MS (EI): (m/z, %), 241 (M<sup>+</sup>-1, 9.08), 160 (100).</b>                                                                                                                                                                                                 |
| 3b              | Yellow crystals<br>(Ethanol)                               | 92                       | >250                  | <b>IR: 2961-2830 (CH aliphatic), 1609 (2C=N).</b><br><b>MS (EI): (m/z, %), 257 (M<sup>+</sup>, 23)</b>                                                                                                                                                                                                                       |
| 3c              | buff needles<br>(Ethanol)                                  | 81                       | 104                   | <b>IR: 2927-2850 (CH aliphatic), 1656-1651 (2C=N).</b><br><b>MS (EI): (m/z, %), 202 (M<sup>+</sup>, 60).</b>                                                                                                                                                                                                                 |
| 4               | Dark red crystals<br>(Ethanol)                             | 88                       | >300                  | <b>IR: 3277(NH), 1723, 1613 (C=O, C=N).</b><br><b><sup>1</sup>H NMR : 0.9-1.3 (m, 10H, H-aliph), 6.8-7.5 (m, 4H, H-Ar) and 10.9(s, 1H, NH).</b><br><b><sup>13</sup>C-NMR: 7.36, 9.2, 13.13, 110.6, 111.12, 122.05, 127.8, 128.2, 134.4, 144.73, 145.19 and 163.4.</b><br><b>MS (EI): (m/z, %), 253 (M<sup>+</sup>, 100).</b> |
| 5               | Bright yellow<br>crystals<br>(Ethanol)                     | 95                       | 205-7                 | <b>IR: 3445(OH), 1622 (2 C=N).</b><br><b><sup>1</sup>H NMR : 6.9-7.6(m, 8H, H-Ar), 8.9(s, 2H, CH=N), and 11.1(s, 2H, OH).</b>                                                                                                                                                                                                |

|    |                              |    |                     |                                                                                                                                                                                                                                                                                                                                                                                                                               |
|----|------------------------------|----|---------------------|-------------------------------------------------------------------------------------------------------------------------------------------------------------------------------------------------------------------------------------------------------------------------------------------------------------------------------------------------------------------------------------------------------------------------------|
|    |                              |    |                     | <b>MS (EI): (m/z, %), 240 (M<sup>+</sup>, 17), and 185(100).</b>                                                                                                                                                                                                                                                                                                                                                              |
| 6a | White crystals<br>(Ethanol)  | 62 | 160-162             | <b>IR (KBr, v/cm<sup>-1</sup>): 1601, 1685 (2 C=N), 3349 broad (NH<sub>2</sub>, NH).<br/><br/><sup>1</sup>H NMR: 1.02 1.4 (m, 10H, H-aliphatic) and 3.8(s, 3H, OCH<sub>3</sub>), 5.8 (s, 1H, CH), 6.7, 7.8 (m, 4H, H-Ar), 8.6 (s, 2H, NH<sub>2</sub>) and 9.8 (s, 1H, NH).<br/><br/><b>MS (EI): (m/z, %), 268 (M<sup>+</sup>-OCH<sub>3</sub>, 6.6).</b></b>                                                                   |
| 7a | Yellow crystals<br>(Ethanol) | 75 | 238-240             | <b>IR (KBr, v/cm<sup>-1</sup>): 3419, 3351 (2NH), 3259, 3190 (NH<sub>2</sub>), 1679, 1613 (C=O, C=N).<br/><br/><sup>1</sup>H NMR: 1.0-1.055 (m, 10H, H-aliphatic), 6.8-7.3 (m, 4H, H-Ar), 10.5 (s, 1H, NH), 10.6 (s, 1H, NH) and 11.1 (s, 2H, NH<sub>2</sub>) .<br/><br/><sup>13</sup>C-NMR: 10-20, 109.9, 111.03, 117.4, 119.98,162.7, 178.66 and 181.13.<br/><br/><b>MS (EI): (m/z, %), 313 (M<sup>+</sup>+2, 8.4).</b></b> |
| 6b | Brown crystals<br>(Ethanol)  | 62 | >250 <sup>o</sup> c | <b>IR: 3469 (NH), 3196, 3351(CH aromatic), 1639, 1605 (C=N).<br/><br/><sup>1</sup>H NMR: 1.0-1.055 (m, 10H, H-aliphatic), 3.1(s, 3H, OCH<sub>3</sub>), 6.8-7.3 (m, 4H, H-Ar), 8.5 (s, 1H, NH).<br/><br/><b>MS (EI): (m/z, %), 313 (M<sup>+</sup>+2, 8.4)</b></b>                                                                                                                                                              |
| 7b | Bage crystals<br>(Ethanol)   | 62 | 262-264             | <b>IR: 3438, 3238 (2NH), 1691, 1622 (C=O, C=N).<br/><br/><sup>1</sup>H NMR: 0.9-2.1 (m, 10H, H-aliphatic), 10.11 (s, 1H, NH), 11.2 (s, 1H, NH) and 6.7-</b>                                                                                                                                                                                                                                                                   |



|     |                                     |    |         |                                                                                                                                                                                                                                                                                                                                                               |
|-----|-------------------------------------|----|---------|---------------------------------------------------------------------------------------------------------------------------------------------------------------------------------------------------------------------------------------------------------------------------------------------------------------------------------------------------------------|
|     |                                     |    |         | <p>8.2 (m, 9H, H-Ar).</p> <p><sup>13</sup>C-NMR: 17.8, 18.9, 23.3, 23.5, 32.14, 85.3, 127.7, 128.6, 130.2, 140.5, 141.8, 142.0, 146.5, 164.7, 165.2, 167.2, and 169.7.</p> <p>MS (EI): (m/z, %) 360 (M<sup>+</sup>- 1, 15.1).</p>                                                                                                                             |
| 8a  | Faint yellow crystals<br>(Methanol) | 95 | 226-8   | <p>IR: 3443, 3320 (NH<sub>2</sub>), 3173, 3137 (2CH=N), 1650, 1613 (C=N).</p> <p><sup>1</sup>H NMR: 6.7-8.0 (m, 8H, H-Ar), 8.3 (s, 1H, CH=N), 9.8(s, 1H, NH<sub>2</sub>) and 11.3 (s, 1H, OH).</p> <p><sup>13</sup>C-NMR: 116, 119.34, 120.37, 126.7, 131.17, 139.7, 156.4 and 177.6.</p> <p>MS (EI): (m/z, %), 297 (M<sup>+</sup>, 2.5), 195(100).</p>       |
| 8b  | Yellow crystals<br>(methanol)       | 55 | 198-200 | <p>IR: 1689,1623 (2 C=N).</p> <p><sup>1</sup>H NMR: 6.9-7.6 (m, 8H, H-Ar), 8.99 (s, H, CH=N) and 11.1(s, 2H, 2OH).</p> <p>MS (EI): (m/z, %), 356 (M<sup>+</sup>, 20).</p>                                                                                                                                                                                     |
| 10a | Brown crystals<br>(Ethanol)         | 62 | 152-154 | <p>IR: 1704, 1643, 1600 (C=O, 2C=N).</p> <p><sup>1</sup>H NMR: 1.9-2.0 (m, 13H, H-aliphatic, CH<sub>3</sub>) and 6.9-8.3 (m, 6H, H-Ar).</p> <p><sup>13</sup>C-NMR: 20.5, 23.8, 31.4,32.6, 34.7, 72.25, 146.9, 149.8, 150.8, 151.1, 152.5, 153.09, 154.1, 154.9, 155.18, 155.53, 184.8, and 18873.</p> <p>MS (EI): (m/z, %), 289 (M<sup>+</sup>- 4, 10.6).</p> |
| 10b | Yellow crystals<br>(acetic acid)    | 74 | 158-160 | <p>IR: 1704,116455 (C=O,2 C=N).</p> <p><sup>1</sup>H NMR: 0.8-2.1 (m, 10H, H-aliphatic), 1.8 (s,3H, CH<sub>3</sub>) and 7.4-8.3 (m, 11H, H-Ar,</p>                                                                                                                                                                                                            |

|    |                                   |    |         |                                                                                                                                                               |
|----|-----------------------------------|----|---------|---------------------------------------------------------------------------------------------------------------------------------------------------------------|
|    |                                   |    |         | CH=C).                                                                                                                                                        |
|    |                                   |    |         | <sup>13</sup> C-NMR (DMSO-d <sub>6</sub> ): δ ppm 10-20, 14.02, 20.5, 21.06, 125.1-133.7 Ar-C, 163.06, 165.8, 167.3, 169.12, and 172.03.                      |
|    |                                   |    |         | MS (EI): (m/z, %), 352 (M <sup>+</sup> , 1.9).                                                                                                                |
| 11 | Faint yellow needles<br>(Ethanol) | 82 | 230-232 | IR: 1675, 1660 (C=O, C=N).                                                                                                                                    |
|    |                                   |    |         | <sup>1</sup> H NMR: 1.02-2.1 (m, 13H, H-aliphatic, CH <sub>3</sub> ) and 7.9-8.2 (m, 4H, H-Ar).                                                               |
|    |                                   |    |         | <sup>13</sup> C-NMR: 10.55-70.5, 148.1, 154.37, 155.9, and 203.8.                                                                                             |
|    |                                   |    |         | MS (EI): (m/z, %), 267 (M <sup>+</sup> , 3.6).                                                                                                                |
| 13 | Buff crystals<br>(Methanol)       | 89 | 185-186 | IR: 3450 (2NH), 3428 (NH), 1687, 1603 (2C=O).                                                                                                                 |
|    |                                   |    |         | <sup>1</sup> H NMR: 1.2-1.5 (m, 10H, H-aliphatic), 6.1(s, 1H, NH), 7.7-8.01 (m, 1H, H-Ar), and 11.52(s, 1H, NH).                                              |
|    |                                   |    |         | <sup>13</sup> C-NMR: 16.6-77, 18.1, 20.1, 20.9, 110.99, 125.3, 125.93, 130.56, 131.87, 134.47, 159.48, 181.24 and 184.73.                                     |
|    |                                   |    |         | MS (EI): (m/z, %), 296 (M <sup>+</sup> , 1.5).                                                                                                                |
| 14 | White crystals<br>(Acetic acid)   | 72 | >250    | IR: 3459(OH), 1746, 1660, 1605 (2C=O, C=N). <sup>1</sup> H NMR: 0.6-1.8 (m, 10H, H-aliphatic), 7.8-8.1 (m, 5H, H-Ar) 77.9 (s, 1H, NH) and 11.5 (s, 1H, COOH). |
|    |                                   |    |         | <sup>13</sup> C-NMR: 18.6, 77.28, 131.5, 131.7, 132.3, 149.2, 152.6, 152.8, 152.9, and 165.6.                                                                 |
|    |                                   |    |         | MS (EI): (m/z, %), 272 (M <sup>+</sup> , 25).                                                                                                                 |

|    |                              |    |         |                                                                                                                                                                                                                                                                                                                                                                                            |
|----|------------------------------|----|---------|--------------------------------------------------------------------------------------------------------------------------------------------------------------------------------------------------------------------------------------------------------------------------------------------------------------------------------------------------------------------------------------------|
| 15 | Brown crystals<br>(Methanol) | 55 | >260°   | <b>IR: 1799, 1728, 1634 (2C=O, C=N).</b><br><b><sup>1</sup>H NMR: 0.8-2.1 (m, 10H, H-aliphatic), 6.7 (dd, 2H, H-Ar).</b><br><b><sup>13</sup>C-NMR: 34.2-82.8, 175.01, 153.65, 188.85 and 194.0.</b><br><b>MS (EI): (m/z, %), 204 (M<sup>+</sup>, 56).</b>                                                                                                                                  |
| 16 | White needles<br>(DMF)       | 82 | 245-8   | <b>IR: 1735 (2C=O).</b><br><b><sup>1</sup>H-NMR (DMSO-d6) δ ppm 1.8-3.5 (m, 14H, H-aliph).</b><br><b><sup>13</sup>C-NMR: 26.3-72, 172.0 and 172.2.</b><br><b>MS (EI): (m/z, %), 206 (M<sup>+</sup>, 62).</b>                                                                                                                                                                               |
| 17 | White crystals<br>(Ethanol)  | 65 | 125-126 | <b>IR (KBr, v/cm<sup>-1</sup>):3198 (NH), 2264(—C≡N), 1679 (C=N).</b><br><b><sup>1</sup>H NMR : 0.6-2.03 (m, 10H, H-aliphatic), 3.9 (s, 2H, CH<sub>2</sub>) and 10.86 (s, 1H, NH).</b><br><b><sup>13</sup>C-NMR (DMSO-d6): δ ppm 5.92, 6.86, 10.5, 11.03, 24.57, 36.2, 116.24, 157.92, 163.2, 165.3, and 171.6.</b><br><b>MS (EI): (m/z, %), 191 (M<sup>+</sup>, 13), 123(100).</b>        |
| 18 | Brown pellets<br>(Ethanol)   | 33 | 210-11  | <b>IR: 3337(NH), 3166, 3100 (NH<sub>2</sub>), 1689, 1654 (C=O, C=N).</b><br><b><sup>1</sup>H NMR : 0.8-1.8 (m, 10H, H-aliphatic), 4.1(s, 1H, CH-N), 5.6 (s, 1H, NH), 5.8 (S, 1H, H-Ar) and 9.8(s, 2H, NH<sub>2</sub>).</b><br><b><sup>13</sup>C-NMR: 10.17, 18.6, 21.17, 36.27, 56.08, 74.23, 157.0, 159.3 and 171.7.</b><br><b>MS (EI): (m/z, %), 193 (M<sup>+</sup>, 1.5), 69 (100).</b> |

---

|    |                            |    |         |                                                                                                                                                                                                                             |
|----|----------------------------|----|---------|-----------------------------------------------------------------------------------------------------------------------------------------------------------------------------------------------------------------------------|
| 20 | Brown needles<br>(Ethanol) | 45 | 135-2°c | <b>IR: 3432 (NH), 1675, 1660 (C=O, C=N).</b><br><b><sup>1</sup>H NMR: 0.8 -1.8 (m, 13H, H-aliphatic, CH<sub>3</sub>), 7.7-7.9 (m, 4H, H-Ar) and 8.2 (s, 1H, NH).</b><br><b>MS (EI): (m/z, %), 326 (M<sup>+</sup>, 100).</b> |
|----|----------------------------|----|---------|-----------------------------------------------------------------------------------------------------------------------------------------------------------------------------------------------------------------------------|

---

212

213

214

215

216

217

218

219

220

221

222

223 **Figure S2. Caspase 3 assay.**

224 **Compound 16**

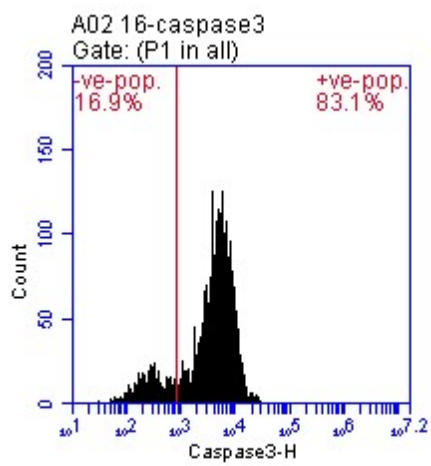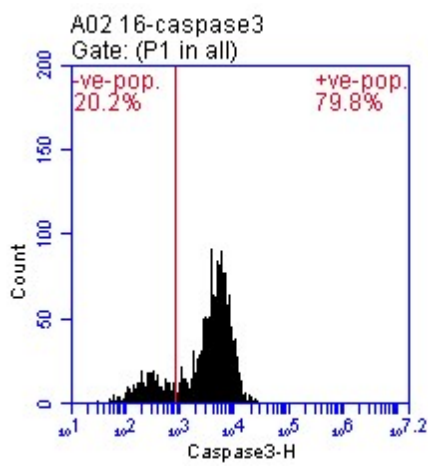

225

226 **Compound 2**

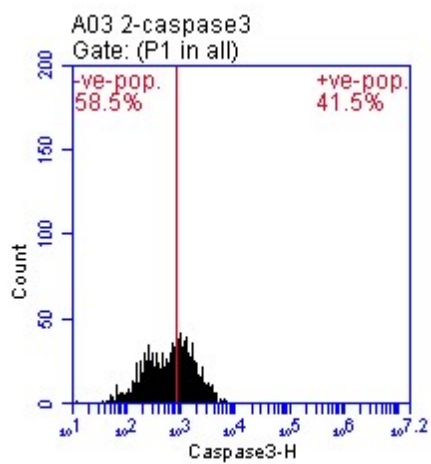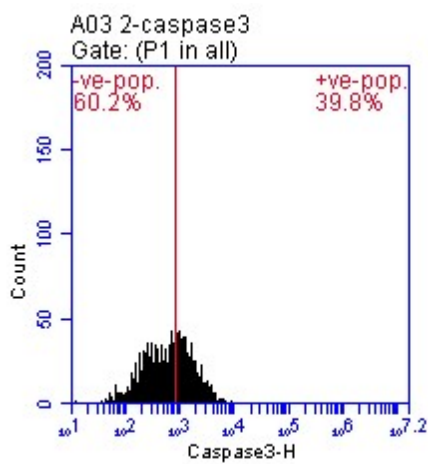

227

228

229

230

231

232

233 **Compound 18**

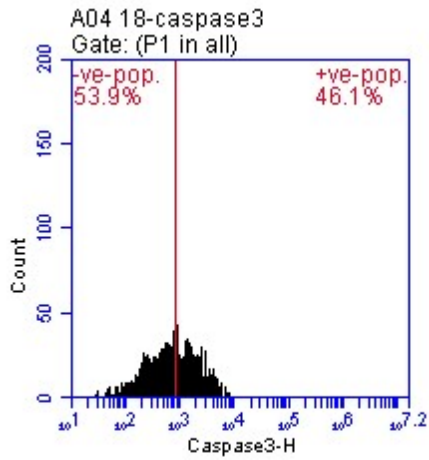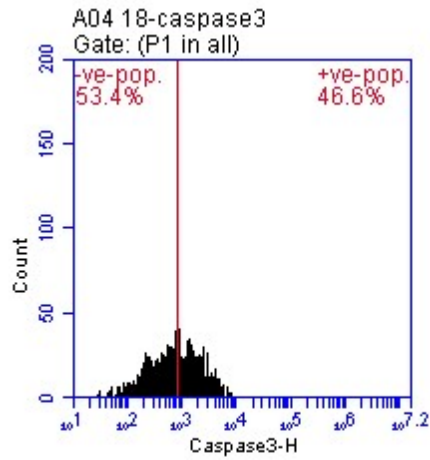

234

235 **Media (No treatment)**

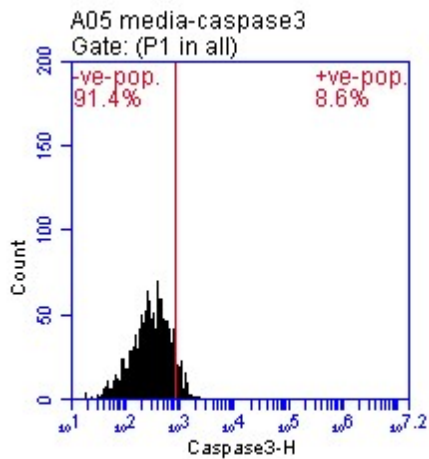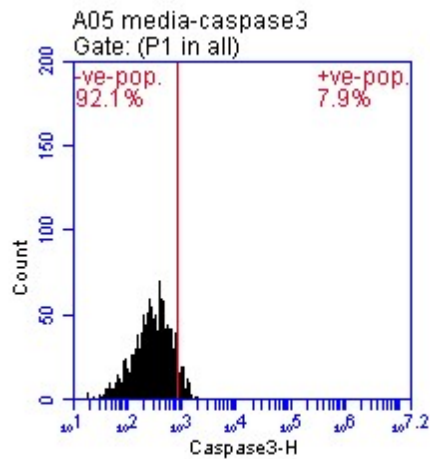

236

237

238

239

240

241

242

243

244 **Compound 13**

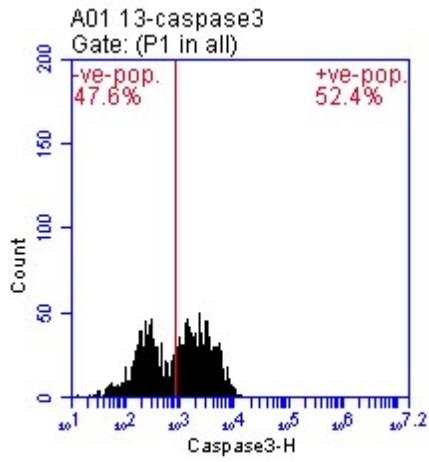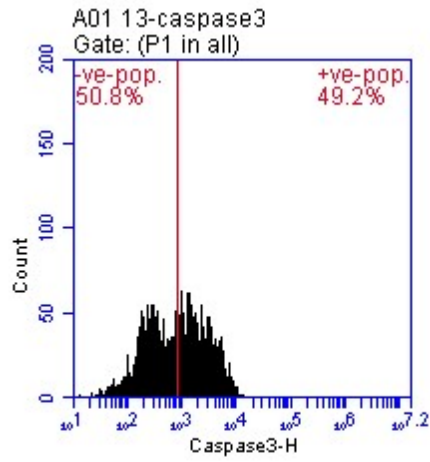

245

246 **Sorafenib**

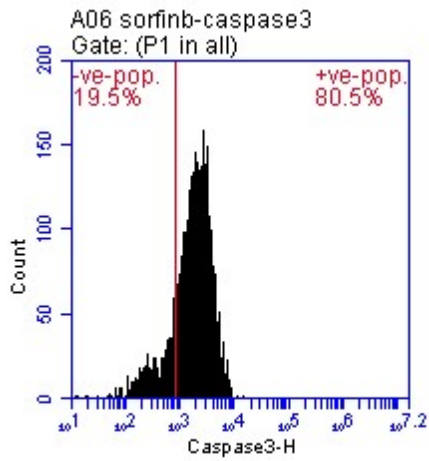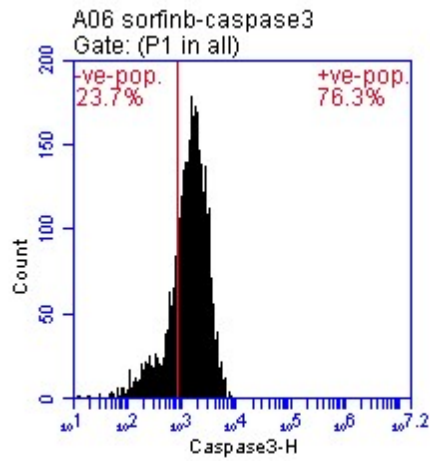

247

248

249

250

251

252

253

254

255 **Compound 8a**

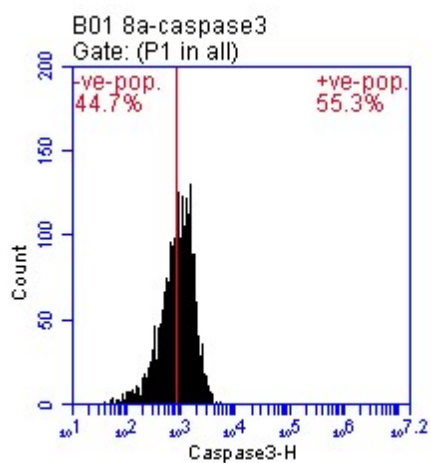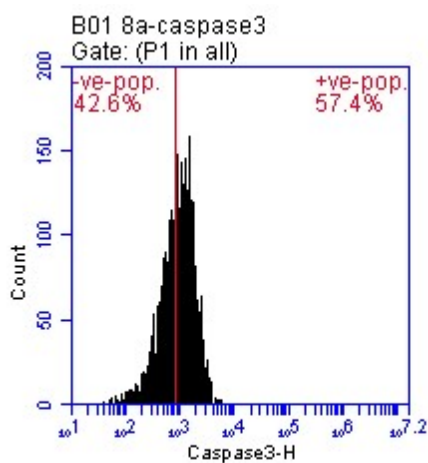

256

257 **Compound 20**

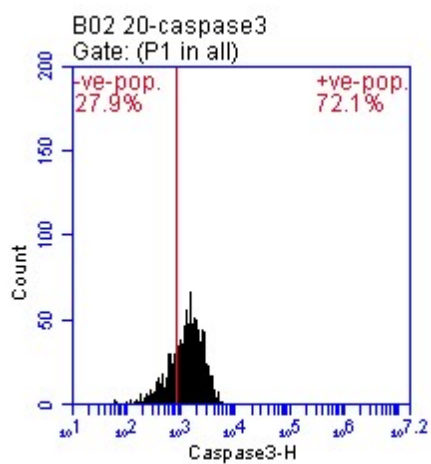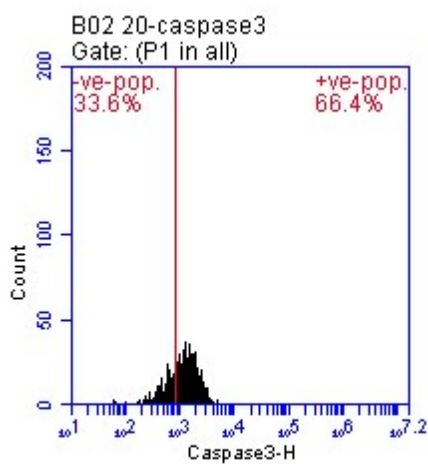

258

259

260

261

262



263

264

265

266 **Compound 4**

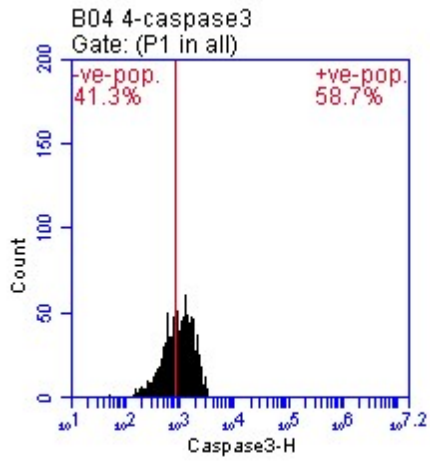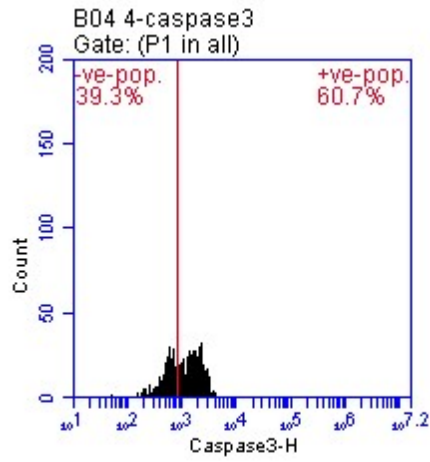

267

268

269

270

271

272

273

274

275

276

277

278

279

280

281 **Figure S3. Cell cycle analysis.**

282

283 **Media (No treatment)**

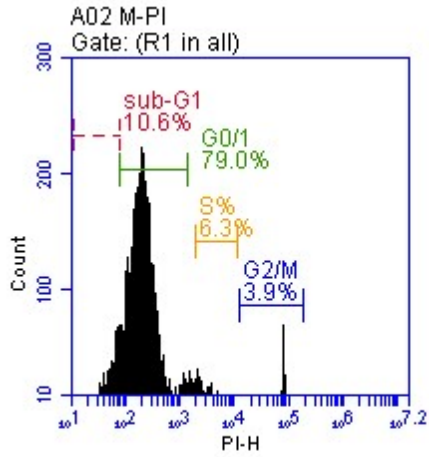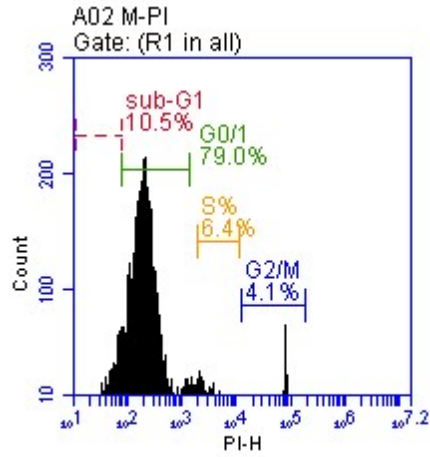

284

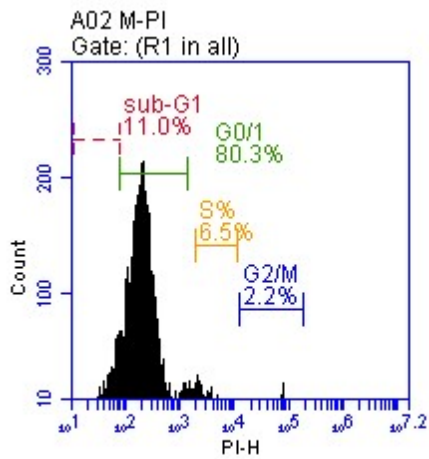

285

286

287

288

289

290

291

292

293

294

295 **Sorafenib**

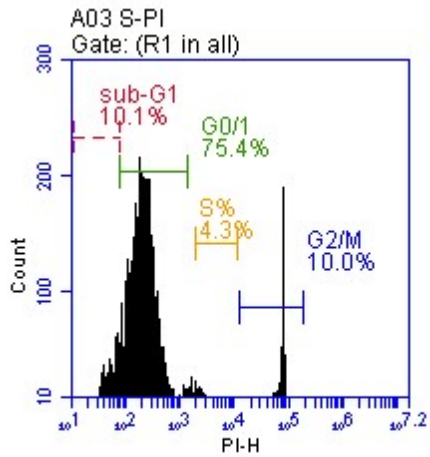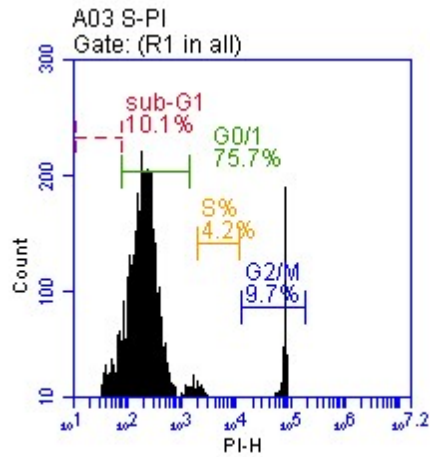

296

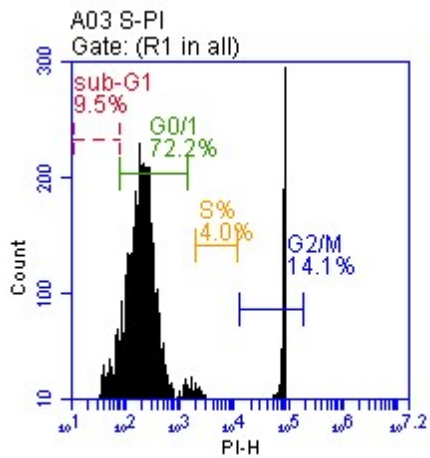

297

298

299

300

301

302

303

304

305

306 **Compound 16**

307

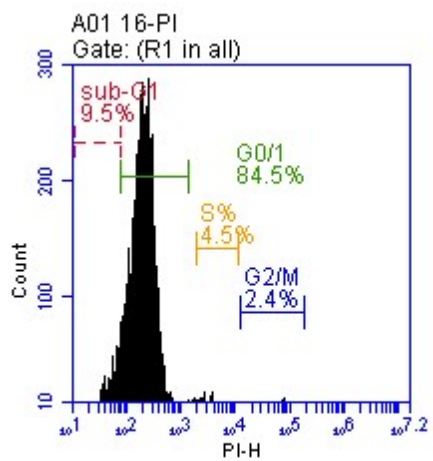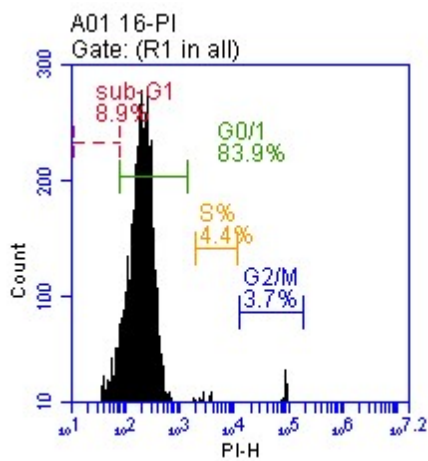

308

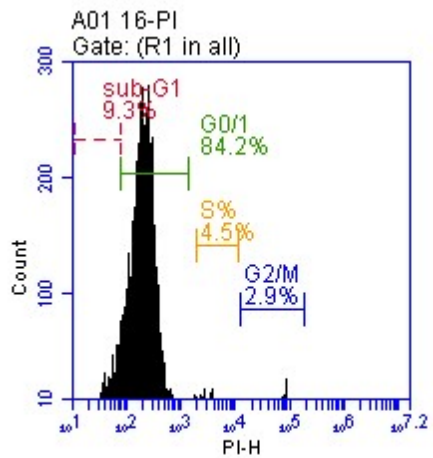

309

310

311

312
